# Supplementary material for: Identification of SNPs associated with magnesium and sodium uptake and the effect of their accumulation on micro and macro nutrient levels in Vitis vinifera
Source: PeerJ journal article supplement (doi:10.7717/peerj.10773), 2021-02-08
Supplement: Supplemental_Figures_and_Tables.pdf [file Supplemental_Figures_and_Tables.pdf]

- 1 Supplemental Figure 1. Histograms for untransformed nutrient concentrations across 249
- 2 *Vitis vinifera* F1 individuals.



3

- 1 Supplemental Figure 2. Hierarchical Clustering of concentration B (1), Al (2), Fe (3), Na (4), Ca (5), and Mg (6) and presence of
- 2 symptoms (red = symptomatic, gray = asymptomatic) (7) in A. 2015 and B. 2016. Each line represents the nutrient concentration of an
- 3 individual from low (bright green) to high (red.).



- 1 Supplemental Figure 3. Estimated linkage disequilibrium decay of the F<sub>1</sub> VxT population based on pairwise r<sup>2</sup> of SNPs aligned to the
- 2 PN40024 genome.



- 1 Supplemental Figure 4. Genome-wide associations across the Thompson Seedless genome for each of the phenotypic traits evaluated.
- 2 Green lines denoting significance are visible on all nutrients and years where significant SNPs were detected. For those without a
- 3 significance threshold, no significant SNPs were detected and the scale bar did not extend high enough to include it.
- 4
- 5



1 Supplemental Figure 5. BLAST2GO molecular function grouping for genes identified with SNPs aligned to the Thompson Seedless  
 2 genome and associated with symptoms in 2015 and 2016.

3



4

- 1 Supplemental Table 1: Mean Best Linear Unbiased Predictors (BLUPs) averaged across 2015 and 2016 for each nutrient
- 2 concentration measured across 249 *Vitis vinifera* F1 individuals.

| Individual | Nitrogen | Potassium | Aluminum | Magnesium | Boron  | Calcium | Sulfur | Sodium | Iron   | Phosphorus | Zinc  | Plant Stunting | Marginal Chlorosis | Symptoms |
|------------|----------|-----------|----------|-----------|--------|---------|--------|--------|--------|------------|-------|----------------|--------------------|----------|
| Mg 1001    | -0.11    | 0.14      | -16.55   | 4.65      | 12.68  | -0.03   | 0.00   | -0.01  | -23.86 | -0.01      | 0.01  | -0.18          | -0.15              | -0.19    |
| Mg 1002    | -0.04    | 0.22      | 2.15     | -2.87     | -5.35  | -0.09   | 0.00   | 0.00   | 6.42   | 0.01       | 1.73  | -0.18          | 0.27               | 0.24     |
| Mg 1004    | -0.02    | 0.03      | 3.68     | -1.41     | -6.26  | -0.14   | 0.00   | -0.01  | 2.97   | 0.00       | -0.27 | -0.18          | -0.15              | -0.19    |
| Mg 1005    | -0.01    | -0.10     | -17.12   | -0.44     | -12.27 | -0.16   | -0.01  | -0.01  | -31.84 | 0.00       | 0.30  | -0.18          | -0.15              | -0.19    |
| Mg 1006    | -0.05    | 0.22      | -13.12   | 5.86      | 3.96   | 0.03    | 0.01   | -0.01  | -15.70 | 0.00       | -0.27 | -0.18          | -0.15              | -0.19    |
| Mg 1007    | -0.05    | 0.38      | 9.21     | 3.92      | -3.85  | -0.04   | 0.00   | -0.01  | 14.03  | 0.02       | 1.73  | -0.18          | -0.15              | -0.19    |
| Mg 1008    | 0.02     | 0.28      | -7.96    | 9.25      | 22.60  | -0.06   | 0.03   | 0.00   | -11.53 | 0.01       | 0.30  | -0.18          | -0.15              | -0.19    |
| Mg 1009    | -0.18    | 0.16      | -14.07   | 6.58      | 0.96   | 0.23    | 0.00   | 0.00   | -22.23 | 0.00       | 0.16  | -0.18          | -0.15              | -0.19    |
| Mg 1010    | -0.02    | 0.11      | -14.64   | 4.16      | 4.57   | 0.02    | 0.01   | 0.00   | -20.05 | 0.00       | -0.70 | -0.18          | -0.15              | -0.19    |
| Mg 1012    | -0.01    | 0.17      | -3.76    | -3.11     | -3.85  | 0.11    | 0.01   | 0.00   | -6.82  | 0.02       | -0.27 | 0.68           | 0.70               | 0.68     |
| Mg 1013    | 0.09     | -0.01     | 26.77    | -4.08     | 0.66   | -0.12   | 0.02   | 0.01   | 33.07  | 0.01       | 0.59  | 0.68           | 0.70               | 0.68     |
| Mg 1014    | -0.04    | -0.04     | 15.89    | 4.89      | 10.58  | 0.35    | 0.01   | -0.01  | 23.64  | 0.00       | 1.16  | -0.18          | -0.15              | -0.19    |
| Mg 1015    | -0.01    | 0.05      | -7.96    | -0.69     | 5.47   | -0.02   | 0.00   | -0.01  | -14.07 | 0.01       | 2.44  | -0.18          | -0.15              | -0.19    |
| Mg 1016    | -0.02    | 0.14      | 5.40     | 1.01      | 24.10  | -0.15   | 0.00   | -0.01  | -0.29  | 0.00       | 0.16  | -0.18          | -0.15              | -0.19    |
| Mg 1017    | 0.09     | -0.05     | 20.85    | 7.80      | 22.90  | 0.13    | 0.00   | -0.01  | 30.89  | 0.00       | -0.13 | -0.18          | -0.15              | -0.19    |
| Mg 1018    | -0.04    | 0.14      | -17.31   | 4.16      | -11.07 | 0.03    | -0.01  | -0.01  | -29.12 | 0.00       | 0.30  | -0.18          | -0.15              | -0.19    |
| Mg 1019    | 0.08     | 0.09      | 1.77     | 9.25      | 17.79  | -0.16   | 0.01   | -0.01  | -13.53 | 0.04       | 1.87  | -0.18          | -0.15              | -0.19    |
| Mg 1020    | 0.07     | 0.02      | -24.38   | -1.90     | 16.29  | -0.12   | 0.01   | 0.01   | -39.27 | 0.01       | -0.13 | -0.18          | -0.15              | -0.19    |
| Mg 1021    | -0.16    | 0.08      | 29.82    | 1.25      | 3.66   | 0.07    | 0.02   | -0.01  | 39.23  | 0.00       | -1.41 | 0.68           | 0.70               | 0.68     |
| Mg 1022    | -0.12    | -0.08     | 19.71    | -5.29     | 7.27   | 0.09    | 0.01   | -0.01  | 18.38  | 0.00       | 0.44  | 0.68           | 0.70               | 0.68     |
| Mg 1023    | 0.09     | 0.13      | -2.43    | -1.66     | -0.54  | -0.21   | 0.00   | -0.01  | -12.08 | 0.01       | 1.73  | -0.18          | -0.15              | -0.19    |
| Mg 1024    | -0.02    | 0.15      | 40.13    | 1.98      | -1.75  | -0.29   | 0.00   | -0.01  | 57.73  | 0.00       | 0.01  | -0.18          | -0.15              | -0.19    |
| Mg 1025    | -0.03    | 0.05      | 118.37   | 1.74      | -3.25  | -0.18   | 0.02   | -0.01  | 178.12 | 0.00       | 0.16  | -0.18          | -0.15              | -0.19    |
| Mg 1026    | -0.03    | 0.01      | 26.58    | 4.65      | -1.15  | 0.04    | 0.00   | 0.00   | 37.60  | -0.01      | -0.70 | -0.18          | -0.15              | -0.19    |
| Mg 1027    | -0.04    | -0.11     | 71.05    | 4.16      | 1.56   | 0.27    | 0.01   | 0.00   | 99.79  | 0.00       | -0.98 | -0.18          | -0.15              | -0.19    |
| Mg 1028    | 0.14     | -0.09     | 8.07     | 4.89      | 13.28  | 0.00    | 0.01   | 0.02   | 6.42   | 0.01       | 0.30  | -0.18          | -0.15              | -0.19    |
| Mg 1029    | 0.05     | 0.07      | 40.89    | 3.43      | -3.25  | -0.09   | 0.00   | 0.00   | 61.72  | 0.01       | -1.27 | 0.68           | 0.70               | 0.68     |
| Mg 1030    | 0.08     | 0.24      | 52.15    | 0.28      | 0.06   | -0.35   | 0.00   | 0.01   | 82.39  | 0.01       | -0.27 | 0.68           | 0.70               | 0.68     |
| Mg 1032    | 0.27     | 0.24      | 39.75    | 2.46      | 4.57   | -0.21   | 0.02   | 0.00   | 71.15  | 0.01       | 1.87  | -0.18          | -0.15              | -0.19    |
| Mg 1033    | 0.04     | 0.05      | 45.28    | 9.73      | -0.24  | -0.02   | 0.00   | 0.00   | 79.67  | 0.00       | 0.59  | 0.25           | 0.27               | 0.24     |
| Mg 1034    | 0.05     | 0.12      | 19.52    | -3.84     | 2.76   | -0.23   | 0.00   | -0.01  | 31.44  | 0.00       | -1.13 | -0.18          | 0.27               | 0.24     |
| Mg 1035    | 0.06     | 0.18      | 15.13    | 1.25      | 2.76   | -0.19   | 0.00   | 0.01   | 32.89  | 0.00       | -0.27 | 0.25           | 0.27               | 0.24     |
| Mg 1036    | 0.13     | 0.04      | 6.73     | -5.05     | 4.87   | -0.15   | 0.01   | -0.01  | 15.66  | 0.00       | -1.27 | -0.18          | -0.15              | -0.19    |
| Mg 1037    | 0.07     | 0.04      | 7.49     | 0.28      | -5.65  | 0.05    | 0.01   | -0.01  | 10.95  | 0.01       | -0.27 | -0.18          | -0.15              | -0.19    |

|         |       |       |        |       |        |       |       |       |        |       |       |       |       |       |
|---------|-------|-------|--------|-------|--------|-------|-------|-------|--------|-------|-------|-------|-------|-------|
| Mg 1038 | 0.01  | -0.11 | -12.73 | -4.32 | -13.17 | -0.12 | 0.00  | 0.01  | -18.24 | 0.00  | -1.70 | -0.18 | -0.15 | -0.19 |
| Mg 1040 | 0.19  | 0.05  | 7.30   | 4.89  | -3.25  | -0.23 | 0.00  | 0.01  | 10.77  | 0.00  | 0.30  | -0.18 | -0.15 | -0.19 |
| Mg 1041 | -0.04 | -0.10 | 32.88  | 3.43  | -3.85  | 0.19  | -0.01 | -0.01 | 48.48  | -0.01 | -1.56 | -0.18 | -0.15 | -0.19 |
| Mg 1042 | 0.03  | -0.07 | -2.43  | 3.19  | -3.85  | 0.29  | 0.00  | 0.00  | -5.19  | 0.00  | 2.01  | -0.18 | -0.15 | -0.19 |
| Mg 1043 | 0.10  | -0.09 | 0.43   | -0.69 | 8.47   | 0.02  | 0.00  | 0.00  | -0.84  | 0.00  | -0.56 | -0.18 | -0.15 | -0.19 |
| Mg 1044 | 0.00  | -0.04 | -15.60 | 16.52 | -4.75  | 0.20  | 0.00  | -0.01 | -19.15 | -0.01 | -0.84 | -0.18 | -0.15 | -0.19 |
| Mg 1045 | -0.02 | -0.07 | -9.87  | 3.92  | -0.24  | 0.10  | 0.00  | -0.01 | -12.98 | 0.00  | -1.70 | -0.18 | -0.15 | -0.19 |
| Mg 1046 | -0.06 | -0.17 | 0.82   | 3.19  | 1.86   | 0.23  | 0.00  | -0.01 | 9.50   | -0.01 | -1.84 | -0.18 | -0.15 | -0.19 |
| Mg 1047 | 0.03  | -0.10 | 65.70  | 1.74  | 9.68   | -0.05 | 0.00  | 0.00  | 94.90  | 0.00  | -0.27 | -0.18 | -0.15 | -0.19 |
| Mg 1048 | 0.08  | 0.04  | 13.41  | -7.71 | -9.26  | -0.13 | 0.00  | -0.01 | 16.57  | 0.00  | -0.27 | -0.18 | -0.15 | -0.19 |
| Mg 1050 | 0.04  | 0.03  | 21.04  | -6.99 | -5.96  | -0.10 | 0.00  | -0.01 | 29.26  | 0.00  | -1.84 | 0.68  | 0.70  | 0.68  |
| Mg 1052 | -0.05 | -0.09 | -27.24 | -3.11 | 3.96   | 0.11  | -0.01 | -0.01 | -32.93 | 0.00  | -0.41 | -0.18 | -0.15 | -0.19 |
| Mg 1053 | -0.05 | 0.02  | -18.46 | 7.31  | -2.95  | 0.05  | -0.01 | -0.01 | -18.79 | -0.01 | -1.27 | -0.18 | -0.15 | -0.19 |
| Mg 1054 | -0.05 | 0.10  | -8.54  | 1.74  | 9.68   | 0.04  | 0.00  | 0.01  | -13.89 | 0.01  | -0.56 | 0.68  | 0.70  | 0.68  |
| Mg 1055 | -0.06 | 0.07  | -1.67  | -8.44 | -1.15  | 0.01  | -0.01 | 0.00  | 5.69   | -0.01 | -0.98 | 0.68  | 0.70  | 0.68  |
| Mg 1056 | -0.05 | -0.17 | 17.04  | -0.44 | -4.45  | 0.21  | 0.00  | -0.01 | 26.54  | -0.01 | 0.44  | -0.18 | -0.15 | -0.19 |
| Mg 1057 | 0.10  | -0.01 | -10.83 | 2.46  | -6.86  | 0.16  | 0.03  | 0.00  | -13.16 | 0.00  | 0.30  | -0.18 | -0.15 | -0.19 |
| Mg 1058 | -0.07 | -0.09 | -34.87 | -4.81 | -1.75  | 0.05  | 0.00  | -0.01 | -51.06 | -0.01 | -1.98 | -0.18 | -0.15 | -0.19 |
| Mg 1059 | 0.07  | -0.15 | -37.54 | 0.04  | 0.06   | 0.21  | 0.01  | 0.03  | -51.60 | 0.00  | 0.30  | -0.18 | -0.15 | -0.19 |
| Mg 1060 | -0.05 | -0.19 | -23.42 | 2.46  | 2.76   | 0.50  | 0.00  | 0.00  | -28.58 | -0.01 | -1.84 | -0.18 | -0.15 | -0.19 |
| Mg 1061 | -0.07 | -0.15 | -22.85 | -3.35 | 0.36   | 0.09  | -0.01 | -0.01 | -28.39 | -0.01 | -2.27 | -0.18 | -0.15 | -0.19 |
| Mg 1062 | 0.00  | -0.17 | -19.80 | -3.59 | -4.45  | 0.41  | 0.00  | 0.00  | -22.77 | 0.00  | -0.84 | -0.18 | -0.15 | -0.19 |
| Mg 1063 | 0.04  | 0.07  | -11.21 | 1.98  | 1.86   | 0.18  | 0.01  | -0.01 | -9.90  | 0.00  | 0.16  | -0.18 | -0.15 | -0.19 |
| Mg 1064 | -0.14 | -0.03 | 0.05   | -1.90 | -11.97 | 0.03  | -0.01 | -0.01 | 0.62   | -0.01 | -0.41 | -0.18 | -0.15 | -0.19 |
| Mg 1065 | 0.01  | -0.08 | -19.60 | -4.32 | -8.36  | 0.07  | 0.00  | 0.00  | -30.93 | 0.00  | -0.98 | -0.18 | -0.15 | -0.19 |
| Mg 1067 | 0.06  | -0.06 | 31.16  | 1.74  | 6.37   | -0.12 | 0.01  | 0.07  | 41.77  | 0.01  | 2.01  | 0.68  | 0.70  | 0.68  |
| Mg 1068 | -0.03 | -0.09 | -10.64 | -2.87 | -3.25  | 0.01  | -0.01 | 0.01  | -23.50 | 0.00  | -0.27 | -0.18 | -0.15 | -0.19 |
| Mg 1069 | -0.01 | -0.05 | -3.96  | -8.68 | -2.65  | -0.11 | 0.00  | 0.00  | -4.28  | 0.01  | 0.16  | -0.18 | -0.15 | -0.19 |
| Mg 1070 | 0.02  | -0.04 | 16.85  | -6.74 | -7.16  | -0.24 | -0.01 | 0.00  | 29.44  | -0.01 | -0.98 | -0.18 | -0.15 | -0.19 |
| Mg 1072 | 0.06  | -0.02 | -5.29  | 2.22  | 10.88  | -0.23 | -0.01 | 0.00  | -5.55  | 0.00  | -0.70 | -0.18 | -0.15 | -0.19 |
| Mg 1073 | 0.11  | 0.10  | 40.13  | -2.38 | -11.07 | -0.43 | 0.00  | 0.00  | 59.72  | 0.01  | -1.27 | 0.68  | 0.70  | 0.68  |
| Mg 1074 | 0.02  | 0.01  | -15.60 | 7.31  | -1.75  | 0.06  | 0.00  | 0.00  | -6.64  | 0.00  | 1.44  | -0.18 | -0.15 | -0.19 |
| Mg 1075 | 0.10  | 0.08  | -17.31 | 1.01  | -5.65  | -0.21 | 0.00  | -0.01 | -19.15 | -0.01 | -0.84 | -0.18 | -0.15 | -0.19 |
| Mg 1076 | -0.06 | -0.11 | -15.22 | -0.69 | -9.86  | 0.13  | 0.00  | -0.01 | -25.31 | -0.01 | -1.13 | -0.18 | -0.15 | -0.19 |
| Mg 1077 | 0.12  | -0.12 | -33.54 | -6.74 | -3.85  | -0.06 | -0.01 | -0.01 | -48.52 | -0.01 | -1.98 | -0.18 | -0.15 | -0.19 |
| Mg 1078 | 0.06  | 0.15  | -32.77 | -3.59 | 5.47   | -0.05 | 0.00  | 0.05  | -40.00 | 0.00  | -0.70 | 0.25  | 0.27  | 0.24  |
| Mg 1079 | 0.05  | 0.13  | -36.02 | -7.47 | -6.86  | -0.40 | -0.01 | 0.00  | -53.05 | 0.00  | -1.27 | -0.18 | -0.15 | -0.19 |
| Mg 1080 | 0.16  | 0.06  | 14.56  | -7.71 | -2.35  | -0.19 | 0.01  | 0.00  | 21.28  | 0.00  | -1.41 | -0.18 | -0.15 | -0.19 |
| Mg 1081 | -0.06 | 0.03  | 25.43  | -3.11 | -1.15  | 0.09  | -0.01 | 0.02  | 27.81  | 0.00  | 2.58  | 0.68  | 0.70  | 0.68  |

|         |       |       |        |        |       |       |       |       |        |       |       |       |       |       |
|---------|-------|-------|--------|--------|-------|-------|-------|-------|--------|-------|-------|-------|-------|-------|
| Mg 1082 | 0.01  | 0.05  | 56.92  | -0.93  | -2.35 | -0.17 | 0.00  | 0.02  | 78.94  | 0.01  | 0.30  | 0.68  | 0.70  | 0.68  |
| Mg 1083 | 0.07  | -0.07 | -13.69 | -6.26  | 0.36  | -0.06 | 0.00  | 0.00  | -17.15 | -0.01 | -0.98 | -0.18 | -0.15 | -0.19 |
| Mg 1084 | 0.01  | -0.05 | 28.11  | -0.93  | -6.26 | 0.09  | 0.01  | 0.00  | 50.66  | 0.00  | -0.84 | -0.18 | -0.15 | -0.19 |
| Mg 1085 | -0.02 | 0.14  | 9.02   | -0.20  | -7.16 | -0.14 | 0.01  | 0.00  | 17.84  | 0.00  | 0.16  | -0.18 | -0.15 | -0.19 |
| Mg 1086 | 0.04  | 0.03  | 24.48  | 0.28   | -1.75 | -0.06 | 0.01  | 0.00  | 38.69  | 0.00  | 0.16  | -0.18 | -0.15 | -0.19 |
| Mg 1087 | 0.12  | -0.01 | -24.57 | -3.35  | -4.15 | -0.11 | 0.00  | -0.01 | -38.91 | 0.00  | -1.27 | -0.18 | -0.15 | -0.19 |
| Mg 1088 | 0.00  | -0.06 | 0.24   | -0.69  | 3.66  | 0.13  | 0.00  | 0.00  | -2.10  | 0.00  | -0.56 | -0.18 | -0.15 | -0.19 |
| Mg 1089 | -0.05 | -0.02 | -38.69 | 7.80   | -8.06 | -0.06 | -0.01 | -0.01 | -51.60 | 0.00  | 0.44  | 0.25  | -0.15 | 0.24  |
| Mg 1090 | -0.17 | -0.06 | 37.08  | 0.77   | 2.76  | 0.03  | -0.01 | 0.00  | 49.03  | -0.01 | 0.30  | 0.68  | 0.70  | 0.68  |
| Mg 1091 | 0.05  | -0.01 | 0.24   | -4.81  | -1.75 | 0.00  | 0.00  | 0.00  | 0.80   | 0.02  | 0.30  | -0.18 | -0.15 | -0.19 |
| Mg 1092 | -0.03 | -0.17 | -2.62  | -1.66  | -8.96 | 0.27  | 0.00  | -0.01 | -5.73  | 0.00  | -0.27 | 0.25  | -0.15 | 0.24  |
| Mg 1093 | -0.05 | -0.11 | 17.23  | -4.08  | -7.16 | -0.11 | -0.01 | -0.01 | 24.37  | 0.00  | -1.13 | 0.25  | 0.27  | 0.24  |
| Mg 1094 | 0.18  | -0.08 | -8.34  | -8.68  | -7.16 | -0.39 | -0.01 | -0.01 | -3.01  | 0.00  | -1.41 | -0.18 | -0.15 | -0.19 |
| Mg 1096 | -0.04 | 0.01  | -24.76 | -3.59  | 8.47  | -0.05 | 0.00  | 0.00  | -28.58 | -0.01 | -0.27 | -0.18 | -0.15 | -0.19 |
| Mg 1097 | 0.06  | 0.07  | 124.29 | 2.71   | 3.96  | -0.31 | 0.00  | 0.00  | 189.90 | 0.02  | 0.01  | 0.68  | 0.70  | 0.68  |
| Mg 1098 | 0.03  | 0.07  | 41.66  | -1.17  | -2.95 | -0.26 | 0.00  | 0.00  | 61.54  | 0.01  | -1.70 | 0.68  | 0.70  | 0.68  |
| Mg 1099 | -0.11 | 0.09  | -15.02 | -0.69  | 3.96  | -0.11 | -0.01 | -0.01 | -23.86 | -0.01 | -1.41 | -0.18 | -0.15 | -0.19 |
| Mg 1100 | 0.13  | 0.00  | -11.21 | -9.17  | 15.09 | -0.31 | 0.00  | 0.06  | -11.71 | 0.01  | -0.13 | -0.18 | -0.15 | -0.19 |
| Mg 1101 | 0.04  | -0.10 | 26.01  | -3.35  | 18.09 | 0.12  | 0.00  | 0.01  | 34.70  | 0.00  | 0.44  | 0.25  | -0.15 | 0.24  |
| Mg 1102 | 0.12  | -0.11 | -13.50 | -5.53  | 29.51 | 0.22  | 0.00  | 0.00  | -18.24 | 0.00  | 0.87  | -0.18 | -0.15 | -0.19 |
| Mg 1103 | 0.17  | 0.02  | 28.87  | -2.14  | 2.76  | -0.29 | 0.00  | 0.01  | 44.49  | 0.01  | -0.13 | 0.25  | 0.27  | 0.24  |
| Mg 1104 | 0.01  | -0.05 | -1.47  | 0.53   | -8.66 | 0.02  | -0.01 | 0.01  | 1.88   | 0.00  | 0.87  | -0.18 | -0.15 | -0.19 |
| Mg 1105 | 0.12  | 0.03  | -11.59 | -5.78  | -0.85 | -0.33 | 0.00  | -0.01 | -1.20  | -0.01 | 0.30  | -0.18 | -0.15 | -0.19 |
| Mg 1106 | 0.16  | 0.04  | 0.05   | -14.01 | -1.45 | -0.53 | -0.01 | -0.01 | 18.38  | 0.01  | -1.13 | 0.68  | 0.27  | 0.68  |
| Mg 1107 | 0.10  | -0.20 | -4.91  | -5.53  | 4.27  | -0.20 | -0.01 | 0.01  | 12.22  | 0.00  | -1.13 | -0.18 | 0.27  | 0.24  |
| Mg 1108 | 0.04  | -0.06 | 33.07  | -5.29  | -1.15 | -0.18 | 0.00  | 0.00  | 48.12  | 0.00  | 0.59  | 0.68  | 0.27  | 0.68  |
| Mg 1109 | 0.08  | 0.01  | -13.50 | -5.29  | 3.06  | -0.07 | 0.01  | 0.01  | -15.88 | 0.00  | 2.16  | -0.18 | -0.15 | -0.19 |
| Mg 1110 | 0.06  | -0.06 | -17.51 | 5.61   | -5.05 | 0.07  | 0.00  | 0.01  | -20.78 | -0.01 | 0.16  | -0.18 | -0.15 | -0.19 |
| Mg 1111 | -0.05 | 0.14  | -3.19  | -4.32  | -5.05 | -0.23 | -0.01 | 0.00  | 3.88   | 0.00  | 0.16  | -0.18 | -0.15 | -0.19 |
| Mg 1112 | -0.09 | -0.15 | -41.93 | -3.11  | -6.26 | 0.17  | -0.02 | -0.01 | -61.76 | -0.01 | 1.30  | -0.18 | -0.15 | -0.19 |
| Mg 1113 | -0.04 | -0.12 | -33.15 | -2.62  | 6.07  | -0.05 | -0.02 | -0.01 | -46.53 | -0.01 | -0.41 | -0.18 | -0.15 | -0.19 |
| Mg 1114 | 0.03  | -0.15 | -21.51 | 1.98   | 11.78 | 0.01  | -0.01 | -0.01 | -31.11 | 0.00  | 0.59  | -0.18 | -0.15 | -0.19 |
| Mg 1115 | 0.04  | -0.01 | -24.18 | -5.78  | 11.78 | 0.02  | 0.00  | -0.01 | -36.55 | 0.00  | -0.70 | -0.18 | -0.15 | -0.19 |
| Mg 1116 | 0.08  | 0.06  | -11.21 | -10.14 | -0.54 | -0.16 | 0.00  | -0.01 | -12.62 | 0.00  | 0.16  | -0.18 | -0.15 | -0.19 |
| Mg 1117 | 0.05  | 0.05  | -17.31 | -7.23  | -5.35 | -0.09 | 0.00  | -0.01 | -18.42 | 0.00  | -0.41 | -0.18 | -0.15 | -0.19 |
| Mg 1118 | 0.05  | -0.12 | -23.42 | 0.04   | -1.45 | 0.21  | 0.00  | -0.01 | -31.66 | -0.01 | -0.84 | -0.18 | -0.15 | -0.19 |
| Mg 1119 | 0.02  | 0.02  | -9.11  | -3.59  | 8.17  | 0.13  | 0.00  | 0.01  | -1.38  | 0.00  | 0.01  | 0.25  | 0.27  | 0.24  |
| Mg 1120 | 0.08  | -0.03 | -17.31 | -4.56  | 5.47  | -0.13 | 0.00  | -0.01 | -17.15 | 0.00  | -0.98 | -0.18 | -0.15 | -0.19 |
| Mg 1121 | 0.11  | 0.01  | -21.89 | 1.74   | 16.59 | -0.10 | 0.01  | -0.01 | -30.75 | 0.01  | -0.98 | -0.18 | -0.15 | -0.19 |

|         |       |       |        |        |        |       |       |       |        |       |       |       |       |       |
|---------|-------|-------|--------|--------|--------|-------|-------|-------|--------|-------|-------|-------|-------|-------|
| Mg 1122 | 0.09  | -0.02 | -23.80 | -6.50  | 14.79  | -0.16 | 0.00  | 0.02  | -43.26 | 0.01  | -0.27 | -0.18 | -0.15 | -0.19 |
| Mg 1123 | 0.02  | -0.07 | -6.05  | -1.17  | -3.25  | 0.26  | 0.00  | 0.03  | -8.09  | 0.01  | 0.01  | 0.25  | -0.15 | 0.24  |
| Mg 1124 | -0.04 | 0.04  | -22.28 | 0.77   | -3.85  | 0.04  | 0.00  | 0.00  | -19.51 | 0.00  | -0.13 | 0.25  | -0.15 | 0.24  |
| Mg 1125 | -0.03 | -0.06 | -17.31 | -1.66  | -11.37 | -0.05 | 0.00  | 0.00  | -21.69 | -0.01 | 1.01  | -0.18 | -0.15 | -0.19 |
| Mg 1126 | 0.01  | -0.12 | -6.82  | -2.62  | -2.65  | 0.04  | -0.01 | 0.00  | -11.90 | 0.01  | 0.44  | -0.18 | -0.15 | -0.19 |
| Mg 1127 | -0.13 | 0.12  | 14.37  | -6.99  | -3.85  | 0.04  | 0.00  | -0.01 | 19.47  | 0.00  | -1.13 | 0.68  | 0.70  | 0.68  |
| Mg 1128 | 0.18  | 0.03  | -29.15 | -12.80 | 0.36   | -0.15 | 0.01  | -0.01 | -31.48 | 0.01  | -1.41 | -0.18 | -0.15 | -0.19 |
| Mg 1129 | -0.11 | -0.09 | 69.14  | 14.82  | 15.09  | 0.02  | -0.01 | 0.00  | 99.61  | 0.00  | -0.84 | 0.68  | 0.70  | 0.68  |
| Mg 1132 | -0.09 | 0.33  | -1.09  | 1.25   | 11.78  | -0.30 | -0.01 | 0.00  | 2.79   | 0.00  | -0.41 | -0.18 | -0.15 | -0.19 |
| Mg 1133 | -0.03 | 0.20  | 35.93  | 2.95   | -8.36  | -0.04 | 0.00  | 0.00  | 40.69  | 0.00  | 0.87  | -0.18 | -0.15 | -0.19 |
| Mg 1134 | -0.16 | 0.08  | 23.14  | 2.22   | -2.05  | 0.14  | -0.01 | 0.01  | 41.05  | -0.01 | -0.41 | 0.25  | 0.27  | 0.24  |
| Mg 1135 | -0.01 | -0.16 | 47.95  | 17.73  | -10.16 | 0.15  | 0.00  | 0.00  | 64.62  | -0.01 | -0.13 | -0.18 | -0.15 | -0.19 |
| Mg 1136 | 0.01  | -0.15 | 11.88  | -4.08  | -7.76  | -0.09 | 0.00  | 0.00  | 14.21  | -0.01 | 0.30  | -0.18 | -0.15 | -0.19 |
| Mg 1137 | -0.01 | -0.18 | -11.97 | 4.89   | 4.87   | -0.06 | -0.01 | -0.01 | -24.77 | 0.00  | -0.56 | -0.18 | -0.15 | -0.19 |
| Mg 1139 | 0.08  | 0.13  | 15.70  | 9.98   | 3.36   | 0.11  | 0.02  | 0.00  | 27.27  | 0.00  | 2.44  | -0.18 | -0.15 | -0.19 |
| Mg 1140 | 0.10  | 0.19  | -11.59 | 1.74   | 10.28  | -0.29 | 0.01  | 0.00  | -3.74  | 0.00  | 0.30  | -0.18 | -0.15 | -0.19 |
| Mg 1141 | 0.07  | 0.12  | -7.01  | -2.38  | 4.57   | -0.31 | 0.00  | 0.00  | -7.73  | 0.01  | -0.98 | 0.68  | -0.15 | 0.68  |
| Mg 1142 | 0.21  | -0.04 | -7.20  | -3.84  | -3.25  | 0.07  | 0.01  | -0.01 | -16.25 | 0.02  | 0.16  | -0.18 | -0.15 | -0.19 |
| Mg 1143 | -0.07 | -0.08 | -1.28  | -6.74  | -3.85  | -0.10 | -0.01 | 0.00  | -9.72  | 0.00  | -0.98 | 0.68  | 0.70  | 0.68  |
| Mg 1144 | 0.03  | 0.04  | -23.61 | -6.02  | -4.15  | -0.06 | -0.01 | -0.01 | -41.99 | 0.02  | -0.56 | 0.68  | 0.70  | 0.68  |
| Mg 1145 | 0.00  | 0.35  | 58.26  | 8.28   | -4.75  | 0.06  | 0.01  | 0.01  | 84.02  | 0.01  | 1.73  | 0.68  | 0.70  | 0.68  |
| Mg 1146 | 0.09  | 0.02  | 24.67  | -1.17  | 5.17   | 0.34  | 0.01  | 0.00  | 33.61  | 0.00  | 1.44  | -0.18 | -0.15 | -0.19 |
| Mg 1147 | 0.16  | -0.04 | -15.60 | 9.73   | -4.45  | 0.12  | 0.01  | -0.01 | -19.33 | 0.00  | 0.59  | -0.18 | -0.15 | -0.19 |
| Mg 1148 | -0.09 | -0.17 | 14.75  | 13.37  | 0.36   | 0.36  | -0.01 | 0.03  | 18.57  | -0.01 | 0.01  | 0.25  | -0.15 | 0.24  |
| Mg 1149 | -0.04 | 0.04  | 5.59   | 7.31   | -2.35  | -0.11 | -0.01 | 0.00  | 11.68  | 0.00  | 0.73  | 0.68  | 0.70  | 0.68  |
| Mg 1150 | -0.16 | 0.03  | 5.97   | 1.98   | 13.58  | -0.05 | -0.01 | 0.02  | -2.65  | 0.00  | 0.16  | 0.68  | 0.70  | 0.68  |
| Mg 1151 | 0.02  | -0.04 | -13.69 | 2.22   | 2.16   | 0.08  | 0.00  | 0.00  | -17.52 | 0.00  | 1.16  | -0.18 | -0.15 | -0.19 |
| Mg 1152 | -0.12 | -0.13 | -16.74 | -3.35  | -7.46  | 0.06  | 0.00  | 0.01  | -23.68 | 0.00  | 0.16  | -0.18 | -0.15 | -0.19 |
| Mg 1153 | -0.03 | -0.01 | 4.25   | 7.80   | 0.06   | 0.28  | 0.00  | 0.01  | 14.39  | 0.00  | 1.30  | -0.18 | -0.15 | -0.19 |
| Mg 1154 | -0.08 | -0.10 | -1.67  | 10.22  | -2.35  | 0.31  | 0.00  | 0.01  | -0.47  | 0.00  | -1.70 | -0.18 | -0.15 | -0.19 |
| Mg 1155 | -0.06 | 0.02  | 8.07   | -7.96  | 3.06   | -0.19 | 0.00  | 0.00  | 9.32   | -0.01 | -1.27 | 0.25  | 0.27  | 0.24  |
| Mg 1156 | 0.01  | -0.10 | -12.93 | -3.84  | -10.76 | 0.25  | 0.00  | -0.01 | -18.24 | 0.00  | 0.73  | -0.18 | -0.15 | -0.19 |
| Mg 1157 | 0.09  | 0.00  | -14.64 | -0.93  | -7.16  | 0.21  | 0.01  | -0.01 | -4.82  | 0.01  | 0.73  | -0.18 | -0.15 | -0.19 |
| Mg 1158 | -0.02 | -0.10 | -21.51 | -0.93  | -2.05  | 0.07  | 0.00  | -0.01 | -29.12 | -0.01 | -0.84 | -0.18 | -0.15 | -0.19 |
| Mg 1160 | -0.05 | 0.26  | 16.08  | 3.43   | 4.87   | 0.04  | 0.00  | -0.01 | 6.05   | 0.02  | 1.87  | 0.68  | 0.70  | 0.68  |
| Mg 1161 | -0.02 | 0.00  | 9.21   | -3.11  | 3.36   | 0.08  | 0.00  | 0.00  | 10.77  | 0.00  | -1.13 | -0.18 | -0.15 | -0.19 |
| Mg 1162 | 0.15  | 0.03  | -21.32 | -4.08  | 1.86   | -0.36 | 0.00  | -0.01 | -28.94 | 0.01  | -1.84 | -0.18 | -0.15 | -0.19 |
| Mg 1163 | -0.02 | 0.00  | -0.14  | 0.77   | 4.57   | -0.13 | 0.00  | 0.03  | 21.83  | 0.00  | 6.01  | 0.68  | 0.27  | 0.68  |
| Mg 1164 | -0.03 | 0.12  | -14.64 | 3.68   | -5.65  | 0.10  | 0.01  | 0.00  | -16.07 | 0.00  | 1.44  | -0.18 | -0.15 | -0.19 |

|         |       |       |        |       |        |       |       |       |        |       |       |       |       |       |
|---------|-------|-------|--------|-------|--------|-------|-------|-------|--------|-------|-------|-------|-------|-------|
| Mg 1165 | 0.01  | 0.18  | 6.73   | 0.53  | -4.75  | 0.02  | 0.01  | 0.00  | 12.04  | 0.00  | 0.59  | 0.68  | 0.27  | 0.68  |
| Mg 1166 | -0.06 | -0.12 | -3.96  | -0.69 | -0.24  | 0.19  | 0.00  | 0.00  | -8.27  | -0.01 | -0.98 | -0.18 | -0.15 | -0.19 |
| Mg 1167 | -0.02 | -0.12 | -23.23 | 2.95  | -8.66  | 0.27  | 0.00  | 0.00  | -35.47 | 0.00  | -0.84 | -0.18 | -0.15 | -0.19 |
| Mg 1169 | 0.04  | 0.03  | -21.13 | 21.85 | -8.06  | 0.29  | 0.01  | -0.01 | -16.43 | 0.00  | -0.56 | -0.18 | -0.15 | -0.19 |
| Mg 1170 | -0.08 | 0.32  | -16.36 | 7.07  | -0.85  | 0.05  | 0.00  | -0.01 | -21.50 | -0.01 | -0.41 | -0.18 | -0.15 | -0.19 |
| Mg 1171 | -0.11 | 0.04  | -13.88 | -1.66 | 1.86   | 0.22  | 0.00  | -0.01 | -28.58 | 0.00  | -0.56 | -0.18 | -0.15 | -0.19 |
| Mg 1172 | 0.05  | -0.06 | -7.20  | -4.81 | 17.79  | 0.11  | 0.01  | 0.00  | -21.69 | 0.02  | -0.27 | -0.18 | -0.15 | -0.19 |
| Mg 1173 | -0.04 | 0.00  | -34.68 | -8.93 | -7.76  | -0.21 | -0.01 | -0.01 | -61.21 | -0.01 | 0.01  | -0.18 | -0.15 | -0.19 |
| Mg 1175 | -0.06 | -0.03 | -10.44 | -3.84 | -7.76  | -0.03 | 0.00  | -0.01 | -20.78 | 0.00  | -1.13 | -0.18 | -0.15 | -0.19 |
| Mg 1176 | -0.14 | -0.09 | -11.97 | -1.41 | 2.46   | 0.17  | -0.02 | -0.01 | -20.96 | -0.01 | -0.13 | -0.18 | -0.15 | -0.19 |
| Mg 1177 | -0.07 | -0.16 | -29.15 | 20.16 | -1.15  | 0.56  | 0.00  | -0.01 | -41.09 | -0.01 | 0.44  | -0.18 | -0.15 | -0.19 |
| Mg 1178 | -0.13 | 0.04  | 2.34   | 9.01  | -10.76 | 0.39  | 0.00  | -0.01 | 0.62   | -0.01 | 0.44  | -0.18 | -0.15 | -0.19 |
| Mg 1179 | -0.07 | 0.10  | -32.96 | -7.96 | -8.36  | -0.24 | -0.01 | -0.01 | -46.89 | 0.01  | 1.01  | 0.25  | -0.15 | 0.24  |
| Mg 1180 | -0.13 | -0.11 | -20.75 | -2.38 | -6.26  | 0.06  | -0.01 | -0.01 | -39.09 | 0.00  | 0.30  | 0.25  | -0.15 | 0.24  |
| Mg 1181 | 0.01  | -0.15 | -5.48  | 8.77  | 3.36   | 0.28  | 0.00  | 0.00  | -10.26 | 0.00  | -0.70 | -0.18 | -0.15 | -0.19 |
| Mg 1182 | -0.04 | -0.09 | -13.12 | 8.04  | 6.07   | 0.23  | 0.02  | 0.00  | -15.88 | 0.00  | -0.13 | -0.18 | -0.15 | -0.19 |
| Mg 1183 | -0.06 | -0.04 | -1.09  | 1.74  | 4.57   | 0.36  | 0.00  | 0.00  | -7.18  | 0.00  | -0.56 | -0.18 | -0.15 | -0.19 |
| Mg 1184 | 0.02  | -0.01 | -38.31 | -2.62 | -4.15  | 0.16  | 0.00  | -0.01 | -59.58 | 0.00  | -1.84 | -0.18 | -0.15 | -0.19 |
| Mg 1185 | 0.04  | -0.12 | -28.38 | -5.29 | -8.06  | 0.20  | 0.00  | -0.01 | -42.54 | 0.00  | -0.70 | -0.18 | -0.15 | -0.19 |
| Mg 1187 | -0.17 | -0.14 | -12.16 | -0.93 | -1.75  | 0.30  | -0.01 | 0.00  | -30.21 | 0.01  | -0.41 | -0.18 | -0.15 | -0.19 |
| Mg 1188 | -0.03 | -0.02 | -13.50 | -7.23 | 11.18  | -0.04 | 0.00  | -0.01 | -29.85 | 0.00  | -0.13 | -0.18 | -0.15 | -0.19 |
| Mg 1189 | -0.17 | 0.12  | 9.21   | -1.66 | 2.16   | 0.01  | 0.00  | 0.00  | 4.24   | 0.01  | -0.41 | 0.68  | 0.70  | 0.68  |
| Mg 1190 | -0.05 | -0.03 | 1.96   | -0.44 | 19.29  | 0.00  | 0.01  | -0.01 | -17.15 | 0.02  | 0.16  | -0.18 | -0.15 | -0.19 |
| Mg 1191 | -0.05 | 0.14  | -14.26 | -1.90 | 5.17   | 0.08  | 0.00  | -0.01 | -26.94 | 0.01  | 1.73  | -0.18 | -0.15 | -0.19 |
| Mg 1192 | 0.00  | 0.01  | -28.00 | -5.78 | 17.79  | -0.15 | 0.01  | -0.01 | -43.08 | 0.00  | -0.84 | -0.18 | -0.15 | -0.19 |
| Mg 1193 | 0.02  | -0.15 | -34.11 | -6.74 | -4.75  | -0.08 | -0.01 | -0.01 | -57.22 | -0.01 | -0.84 | -0.18 | -0.15 | -0.19 |
| Mg 1195 | -0.16 | -0.12 | 82.50  | 5.13  | -3.55  | -0.06 | 0.00  | 0.01  | 116.11 | -0.01 | 0.01  | 0.68  | 0.27  | 0.68  |
| Mg 1196 | 0.01  | -0.16 | -7.77  | -8.44 | 9.98   | 0.02  | -0.01 | -0.01 | -19.69 | 0.00  | -0.70 | -0.18 | -0.15 | -0.19 |
| Mg 1198 | 0.01  | -0.07 | -23.61 | -1.41 | -3.85  | 0.01  | 0.00  | 0.00  | -36.37 | 0.00  | 1.01  | -0.18 | -0.15 | -0.19 |
| Mg 1199 | 0.05  | 0.02  | -23.04 | -7.47 | -8.36  | -0.13 | 0.01  | 0.00  | -37.64 | 0.00  | 0.16  | -0.18 | -0.15 | -0.19 |
| Mg 1200 | -0.14 | -0.21 | -26.67 | 9.49  | -5.65  | 0.41  | -0.02 | -0.01 | -44.53 | -0.01 | -0.84 | -0.18 | -0.15 | -0.19 |
| Mg 1201 | 0.22  | 0.14  | -5.48  | 2.46  | 6.37   | 0.10  | 0.02  | -0.01 | -11.53 | 0.02  | 0.87  | -0.18 | -0.15 | -0.19 |
| Mg 1202 | 0.00  | -0.07 | -9.87  | 1.49  | 0.96   | 0.13  | 0.01  | -0.01 | -20.60 | 0.00  | -1.27 | -0.18 | -0.15 | -0.19 |
| Mg 1203 | 0.08  | -0.02 | -4.91  | 3.68  | -11.37 | 0.13  | 0.01  | -0.01 | -12.98 | 0.00  | -0.13 | -0.18 | -0.15 | -0.19 |
| Mg 1204 | -0.06 | 0.00  | -10.44 | -9.17 | 7.27   | 0.02  | 0.00  | 0.00  | -32.02 | 0.01  | 0.01  | 0.25  | 0.27  | 0.68  |
| Mg 1205 | 0.09  | -0.09 | 13.03  | -2.38 | 3.06   | -0.04 | 0.00  | 0.01  | 11.13  | 0.00  | -0.70 | -0.18 | -0.15 | -0.19 |
| Mg 1206 | -0.03 | 0.05  | -11.02 | 14.82 | -7.46  | 0.19  | 0.00  | 0.01  | -23.50 | 0.00  | 1.87  | -0.18 | -0.15 | -0.19 |
| Mg 1208 | 0.02  | 0.03  | -12.16 | -5.53 | -2.65  | -0.16 | -0.01 | 0.00  | -20.60 | 0.00  | 0.16  | -0.18 | -0.15 | -0.19 |
| Mg 1209 | -0.01 | 0.11  | 7.69   | -6.02 | -8.06  | -0.15 | 0.00  | 0.01  | 7.14   | 0.00  | -0.70 | -0.18 | -0.15 | -0.19 |

|         |       |       |        |       |        |       |       |       |        |       |       |       |       |       |
|---------|-------|-------|--------|-------|--------|-------|-------|-------|--------|-------|-------|-------|-------|-------|
| Mg 1210 | 0.01  | -0.02 | -1.86  | -0.44 | -3.55  | 0.02  | 0.00  | 0.02  | -1.74  | 0.01  | 0.01  | -0.18 | -0.15 | -0.19 |
| Mg 1211 | -0.04 | 0.33  | 17.04  | -7.47 | -6.56  | -0.53 | -0.01 | 0.01  | 23.64  | 0.00  | -0.41 | 0.68  | 0.27  | 0.68  |
| Mg 1212 | -0.08 | 0.05  | 36.69  | 2.71  | 19.90  | -0.26 | -0.01 | 0.06  | 61.17  | -0.01 | 1.87  | 0.68  | 0.27  | 0.68  |
| Mg 1213 | 0.02  | -0.05 | -9.11  | -1.90 | -8.06  | -0.02 | -0.01 | 0.00  | -11.90 | 0.00  | 1.73  | -0.18 | -0.15 | -0.19 |
| Mg 1214 | -0.12 | -0.10 | 14.17  | -0.69 | -3.25  | -0.17 | -0.01 | -0.01 | 22.92  | -0.01 | -1.41 | 0.68  | 0.70  | 0.68  |
| Mg 1215 | -0.25 | -0.21 | -21.70 | 5.13  | 7.57   | 0.27  | -0.01 | 0.01  | -25.31 | -0.02 | 0.01  | 0.25  | -0.15 | 0.24  |
| Mg 1216 | -0.04 | 0.03  | -16.36 | -4.08 | 1.26   | -0.31 | -0.02 | -0.01 | -28.58 | -0.01 | -0.98 | 0.68  | 0.70  | 0.68  |
| Mg 1217 | -0.23 | -0.23 | -14.26 | -0.69 | 6.67   | 0.10  | -0.02 | 0.00  | -21.14 | -0.02 | -1.98 | -0.18 | -0.15 | -0.19 |
| Mg 1219 | -0.06 | -0.15 | -31.06 | 6.83  | 2.76   | 0.03  | -0.01 | 0.00  | -39.27 | -0.01 | 0.16  | -0.18 | -0.15 | -0.19 |
| Mg 1223 | -0.02 | -0.06 | -7.96  | -4.32 | -2.65  | -0.09 | 0.01  | -0.01 | -13.16 | 0.00  | -0.13 | -0.18 | -0.15 | -0.19 |
| Mg 1229 | 0.06  | -0.02 | 7.49   | -4.32 | 2.76   | 0.12  | 0.02  | 0.00  | 7.69   | 0.01  | 0.59  | -0.18 | -0.15 | -0.19 |
| Mg 1239 | -0.03 | 0.08  | 23.33  | 10.22 | 0.66   | 0.15  | 0.02  | -0.01 | 35.43  | 0.00  | -0.41 | -0.18 | -0.15 | -0.19 |
| Mg 1241 | -0.09 | 0.16  | 34.59  | 3.19  | -2.95  | -0.03 | 0.00  | -0.01 | 44.13  | 0.00  | -0.70 | 0.68  | 0.70  | 0.68  |
| Mg 1242 | 0.12  | 0.18  | 26.01  | 4.89  | -14.07 | -0.20 | 0.00  | 0.00  | 41.23  | -0.01 | -0.13 | -0.18 | -0.15 | -0.19 |
| Mg 1243 | 0.08  | 0.09  | 5.01   | 22.58 | -5.65  | 0.00  | 0.02  | -0.01 | 6.24   | -0.01 | 0.73  | -0.18 | -0.15 | -0.19 |
| Mg 1244 | 0.04  | -0.06 | 16.66  | 19.19 | -7.76  | 0.14  | 0.01  | -0.01 | 18.93  | 0.00  | 0.44  | -0.18 | -0.15 | -0.19 |
| Mg 1245 | 0.09  | 0.16  | 6.73   | 6.10  | -4.45  | -0.11 | 0.01  | -0.01 | 15.85  | -0.01 | 0.16  | -0.18 | -0.15 | -0.19 |
| Mg 1246 | 0.07  | 0.03  | -5.29  | -2.87 | 0.06   | -0.33 | 0.00  | -0.01 | -7.36  | -0.01 | -0.98 | -0.18 | -0.15 | -0.19 |
| Mg 1247 | -0.14 | 0.17  | 43.18  | 8.77  | 20.20  | -0.18 | 0.00  | -0.01 | 55.01  | -0.01 | 0.30  | 0.68  | 0.70  | 0.68  |
| Mg 1248 | -0.11 | -0.13 | 20.47  | 1.01  | -0.54  | 0.02  | 0.00  | 0.01  | 30.35  | -0.01 | -0.56 | -0.18 | -0.15 | -0.19 |
| Mg 1249 | 0.04  | -0.11 | 0.24   | 1.74  | 6.97   | -0.03 | 0.00  | -0.01 | 5.15   | -0.01 | -0.13 | -0.18 | -0.15 | -0.19 |
| Mg 1250 | 0.00  | 0.21  | 7.30   | -4.81 | 2.76   | -0.13 | 0.00  | 0.01  | 8.05   | -0.01 | -0.27 | -0.18 | -0.15 | -0.19 |
| Mg 1251 | 0.00  | 0.18  | -15.98 | -3.84 | -12.27 | -0.03 | 0.00  | 0.00  | -22.41 | 0.01  | 0.73  | -0.18 | -0.15 | -0.19 |
| Mg 1252 | -0.03 | 0.06  | 27.72  | 7.55  | 3.06   | 0.17  | 0.00  | -0.01 | 41.41  | 0.00  | 1.73  | -0.18 | -0.15 | -0.19 |
| Mg 1253 | 0.03  | 0.11  | -21.51 | 8.04  | 0.06   | -0.04 | 0.00  | -0.01 | -17.33 | -0.01 | 0.73  | -0.18 | -0.15 | -0.19 |
| Mg 1254 | -0.12 | 0.12  | 29.82  | -8.68 | 15.09  | -0.07 | 0.00  | 0.04  | 37.06  | 0.00  | -0.84 | 0.68  | 0.27  | 0.68  |
| Mg 1261 | 0.15  | -0.02 | -11.02 | 1.49  | -2.35  | -0.20 | 0.01  | -0.01 | -19.51 | 0.00  | 0.87  | -0.18 | -0.15 | -0.19 |
| Mg 1262 | 0.00  | 0.08  | 49.67  | 1.98  | -5.05  | -0.12 | 0.00  | 0.00  | 68.06  | 0.02  | -0.41 | 0.68  | 0.70  | 0.68  |
| Mg 1264 | -0.03 | -0.04 | 42.80  | 0.04  | -3.85  | -0.20 | 0.00  | 0.01  | 59.36  | 0.00  | -0.13 | 0.68  | 0.70  | 0.68  |
| Mg 1265 | -0.04 | 0.08  | 84.79  | 5.86  | -0.54  | -0.18 | 0.02  | 0.01  | 126.63 | 0.00  | 0.16  | 0.25  | 0.70  | 0.68  |
| Mg 1267 | 0.06  | 0.07  | 28.11  | 7.80  | 3.66   | 0.02  | 0.02  | 0.00  | 45.58  | 0.01  | 0.44  | -0.18 | -0.15 | -0.19 |
| Mg 1268 | 0.05  | -0.02 | 32.69  | -2.87 | -2.05  | -0.13 | 0.00  | -0.01 | 44.49  | 0.00  | -0.13 | -0.18 | -0.15 | -0.19 |
| Mg 1270 | -0.06 | 0.02  | -9.30  | -6.02 | -11.07 | -0.12 | 0.00  | -0.01 | -9.72  | 0.00  | 0.01  | -0.18 | -0.15 | -0.19 |
| Mg 1274 | -0.04 | 0.01  | 37.46  | -6.02 | -8.36  | -0.23 | 0.00  | 0.00  | 55.01  | -0.01 | -0.27 | 0.25  | 0.70  | 0.68  |
| Mg 1275 | 0.02  | -0.17 | -17.12 | 6.34  | 8.47   | 0.31  | -0.01 | -0.01 | -22.59 | -0.01 | -1.13 | -0.18 | -0.15 | -0.19 |
| Mg 1276 | 0.03  | -0.06 | -8.15  | 0.77  | 1.26   | 0.18  | 0.00  | 0.00  | -16.43 | 0.00  | 0.30  | -0.18 | -0.15 | -0.19 |
| Mg 1277 | 0.14  | 0.09  | -8.73  | -2.62 | -2.95  | -0.22 | 0.00  | 0.00  | -15.88 | 0.01  | 0.73  | -0.18 | -0.15 | -0.19 |
| Mg 1278 | -0.03 | -0.07 | -0.71  | -7.23 | -3.55  | -0.02 | -0.01 | -0.01 | -12.62 | 0.00  | 1.30  | -0.18 | -0.15 | -0.19 |
| Mg 1279 | -0.08 | -0.11 | -27.81 | 24.03 | -8.36  | 0.42  | -0.01 | 0.01  | -41.63 | -0.02 | 2.16  | -0.18 | -0.15 | -0.19 |

|         |       |       |        |        |        |       |       |       |        |       |       |       |       |       |
|---------|-------|-------|--------|--------|--------|-------|-------|-------|--------|-------|-------|-------|-------|-------|
| Mg 1280 | -0.03 | -0.02 | -15.60 | 5.86   | -8.96  | 0.29  | -0.01 | -0.01 | -28.94 | -0.01 | 0.73  | -0.18 | -0.15 | -0.19 |
| Mg 1281 | 0.15  | -0.06 | -41.55 | -3.59  | 3.36   | -0.23 | 0.00  | 0.00  | -62.48 | 0.01  | 1.01  | -0.18 | -0.15 | -0.19 |
| Mg 1282 | -0.06 | 0.04  | 33.26  | 2.22   | 2.76   | -0.32 | -0.01 | 0.00  | 41.23  | 0.01  | 0.16  | 0.68  | 0.70  | 0.68  |
| Mg 1283 | 0.06  | 0.05  | -16.93 | -2.14  | 5.77   | -0.08 | 0.00  | -0.01 | -27.31 | -0.01 | 0.44  | -0.18 | -0.15 | -0.19 |
| Mg 1284 | -0.01 | 0.00  | 30.59  | 1.01   | -4.15  | 0.33  | 0.00  | -0.01 | 40.69  | 0.00  | 0.44  | -0.18 | -0.15 | -0.19 |
| Mg 1285 | 0.01  | -0.09 | 3.68   | 0.53   | 3.66   | 0.10  | 0.00  | -0.01 | 7.14   | 0.00  | -0.56 | -0.18 | -0.15 | -0.19 |
| Mg 1286 | -0.02 | -0.09 | -16.93 | -3.84  | -0.85  | -0.03 | -0.01 | -0.01 | -32.38 | 0.00  | 1.30  | -0.18 | -0.15 | -0.19 |
| Mg 1287 | 0.05  | -0.10 | -50.52 | -5.29  | -10.76 | -0.05 | -0.01 | -0.01 | -75.72 | -0.01 | 0.87  | -0.18 | -0.15 | -0.19 |
| Mg 1289 | -0.15 | -0.09 | 20.47  | -9.90  | -0.54  | 0.04  | -0.01 | 0.01  | 18.75  | 0.00  | 3.15  | 0.68  | 0.70  | 0.68  |
| Mg 1290 | 0.01  | -0.03 | -22.28 | -9.41  | -6.86  | -0.19 | -0.01 | 0.00  | -32.75 | 0.01  | 1.44  | -0.18 | -0.15 | -0.19 |
| Mg 1291 | 0.02  | 0.12  | 1.39   | -6.74  | -9.26  | -0.12 | 0.00  | -0.01 | -5.01  | 0.02  | -0.41 | -0.18 | -0.15 | -0.19 |
| Mg 1292 | -0.15 | -0.01 | -4.91  | 1.98   | -1.45  | 0.34  | 0.01  | -0.01 | -6.46  | -0.01 | 1.30  | -0.18 | -0.15 | -0.19 |
| Mg 1293 | 0.03  | -0.03 | -21.32 | 3.68   | -2.65  | 0.27  | 0.00  | 0.00  | -24.59 | 0.00  | 1.44  | -0.18 | -0.15 | -0.19 |
| Mg 1294 | -0.02 | 0.03  | -9.11  | -6.02  | -7.76  | 0.01  | 0.00  | 0.00  | -12.44 | 0.00  | 1.73  | -0.18 | -0.15 | -0.19 |
| Mg 1295 | 0.06  | -0.16 | -40.02 | -9.65  | -7.46  | 0.48  | 0.00  | 0.00  | -50.15 | 0.00  | 2.30  | -0.18 | -0.15 | -0.19 |
| Mg 1296 | -0.05 | -0.20 | -24.38 | -11.11 | -2.05  | 0.00  | -0.01 | 0.00  | -38.91 | -0.01 | -0.56 | -0.18 | -0.15 | -0.19 |
| Mg 1297 | -0.03 | -0.08 | -37.73 | -1.90  | -11.67 | 0.25  | 0.00  | -0.01 | -55.05 | 0.00  | 1.30  | -0.18 | -0.15 | -0.19 |
| Mg 1298 | -0.11 | -0.11 | -32.58 | -4.08  | -9.86  | 0.19  | 0.00  | -0.01 | -46.16 | -0.01 | -0.27 | -0.18 | -0.15 | -0.19 |
| Mg 1299 | -0.01 | -0.06 | -53.77 | -13.05 | -7.46  | -0.12 | -0.01 | -0.01 | -83.51 | -0.01 | -0.70 | -0.18 | -0.15 | -0.19 |
| Mg 1300 | -0.07 | -0.15 | -31.63 | 6.83   | 8.47   | 0.18  | -0.01 | 0.00  | -42.17 | -0.01 | 2.73  | -0.18 | -0.15 | -0.19 |

1 Supplemental Table 2: Pearson's Correlation Coefficients for nutrients measures in 2015 (bottom half colored gray) and 2016 (top  
 2 colored half white)  
 3

|    | N                    | S                    | P                    | K             | Mg            | Ca                   | Na                   | Fe            | Al            | Mn            | B        | Cu      | Zn            | Symptoms           |               |                      |               |               |
|----|----------------------|----------------------|----------------------|---------------|---------------|----------------------|----------------------|---------------|---------------|---------------|----------|---------|---------------|--------------------|---------------|----------------------|---------------|---------------|
| N  |                      | 0.0658*<br>**        | 0.0480*<br>**        | -0.0415*      | 0.0672*<br>** | 0.0859*<br>**        | -0.0080              | 0.0652        | 0.0641        | 0.0120        | -0.0461  | 0.0517  | -0.0397       | -0.1198*           |               |                      |               |               |
| S  | <b>0.4852*</b><br>** |                      | 0.0199*<br>**        | 0.0305*<br>** | 0.0017        | 0.0765*              | -0.0731              | 0.0321*<br>** | 0.0371*<br>** | 0.1283*<br>** | 0.0417*  | -       | 0.0193*<br>** | -0.0467*<br>0.0418 |               |                      |               |               |
| P  | <b>0.3674*</b><br>** | <b>0.4856*</b><br>** |                      | -             | 0.0114*<br>** | 0.0550               | -0.1348*             | 0.0052        | 0.0552*<br>** | 0.0576*<br>** | -0.1298  | 0.0374* | -             | 0.0359*<br>**      | 0.0253*<br>** | 0.0853*<br>**        |               |               |
| K  | 0.0941               | <b>0.3154</b>        | <b>0.4310*</b><br>** |               | -             | 0.2209*<br>**        | -0.1474              | 0.0666*<br>** | 0.0534*<br>** | 0.0605        | 0.0696   | -       | 0.1061*<br>** | -                  | 0.0009*<br>** | <b>0.5834*</b><br>** |               |               |
| Mg | -                    | <b>0.3552*</b><br>** | -                    | 0.0979*<br>** |               | 0.0773               | -0.1182              | -             | 0.1738*<br>** | 0.2105*<br>*  | 0.2126   | 0.2129* | -             | 0.1709*<br>**      | 0.1796*<br>** | 0.1364*<br>**        | 0.0309*<br>** | 0.0991*<br>** |
| Ca | -                    | <b>0.3393*</b><br>** | 0.0370               | -0.1476*      | -             | <b>0.4599*</b><br>** | <b>0.4414*</b><br>** |               | 0.0375        | 0.1189*<br>*  | -0.1209* | -       | 0.0240*<br>** | -0.0218            | -0.0793       | -0.0304*             | 0.1717*<br>** |               |
| Na | -0.0182              | 0.0276               | 0.1362*              | 0.0430        | 0.3175*<br>** | 0.1414*              |                      | 0.1264*<br>*  | 0.1150*<br>*  | -0.1383       | 0.1282   | -       | 0.0229*<br>*  | -                  | 0.0619*<br>** | 0.1822*<br>**        |               |               |

|          |          |         |          |         |                |                |         |         |         |         |          |          |          |         |
|----------|----------|---------|----------|---------|----------------|----------------|---------|---------|---------|---------|----------|----------|----------|---------|
| Fe       | -0.1512* | 0.0970  | 0.0127   | 0.1419* | 0.1663*        | 0.0729         | 0.1847* |         | 0.9675* | 0.2478* |          | 0.0619*  |          | 0.2284* |
|          | -        |         |          |         |                |                |         |         | **      | *       | -0.0181* | **       | 0.1048*  | **      |
| Al       | 0.2220*  | 0.0546  | 0.0497   | 0.1566* | 0.2220*        | 0.0702         | 0.1601* | 0.9675* |         | 0.0254* |          | 0.0237*  |          | 0.0453* |
|          | *        |         |          |         | *              |                |         | **      |         | *       | 0.0148*  | **       | -0.0184* | **      |
| Mn       | -        |         |          |         |                |                |         |         |         |         |          |          |          |         |
|          | 0.2626*  |         |          |         | <b>0.3666*</b> | <b>0.5618*</b> |         | 0.2478* | 0.2520* |         |          |          | 0.0509*  |         |
|          | **       | 0.1324* | -0.1350* | -0.0504 | **             | **             | 0.1167  | **      | **      |         | 0.0805*  | -0.0297* | *        | 0.0648* |
| B        | 0.0947   | 0.1494* | 0.0769   | -0.0654 | 0.1767*        | 0.0432         | 0.1391* | -0.0181 | -0.0173 | 0.0484  |          | -0.0117  | -0.1072  | 0.0312  |
| Cu       |          |         |          |         |                |                |         |         |         |         |          |          | -        | -       |
|          | -0.0277  | 0.0096  | 0.0276   | 0.0768  | 0.0945         | -0.0068        | 0.1787* | 0.0619  | 0.0642  | 0.0416  | 0.0361   |          | 0.0546*  | 0.1629* |
|          |          |         |          |         |                |                |         |         |         |         |          |          | **       | **      |
| Zn       | -0.0547  | 0.1616* | 0.2889*  | 0.2367* | 0.0981         | 0.1142         | 0.1744* | 0.1048  | 0.1217  | 0.1591* | -0.0184  | 0.1399*  |          | 0.7816  |
|          | *        |         | **       | *       |                |                |         |         |         |         |          |          |          |         |
| Symptoms | -        |         |          |         |                |                |         |         |         |         |          |          |          |         |
|          | 0.2275*  | -0.2259 | 0.0370   | 0.0583  | <b>0.6146*</b> | 0.0059         | 0.2973* | 0.2149* | 0.2406* |         |          |          |          |         |
|          | *        |         |          |         | **             |                | **      | *       | **      | 0.0881  | 0.0519   | 0.0270   | -0.0874  |         |

1

2 Significant at  $\leq 0.0001$  (\*\*\*) 0.001 (\*\*) and 0.05 (\*).

3

4

1 Supplemental Table 3: Pearson correlation coefficients among nutrients in 2015 (year 1) and 2016 (year 2).

|         | N             | S             | P             | K             | MG            | CA            | NA            | F             | AL            | MN            | B             | CU              | ZN           |
|---------|---------------|---------------|---------------|---------------|---------------|---------------|---------------|---------------|---------------|---------------|---------------|-----------------|--------------|
| N2      | 0.2661**<br>* | 0.1060        | 0.2055**      | 0.1459*       | -0.1263*      | -0.2169**     | 0.0564        | -0.0251       | -0.0546       | -0.1464       | -0.0365       | 0.006<br>5      | 0.1053       |
| S2      | 0.0658        | 0.3093**<br>* | 0.0751        | 0.1188        | 0.0241        | -0.0308       | -0.0370       | 0.0998        | 0.0755        | 0.0893        | 0.0144        | 0.085<br>4      | 0.0455       |
| P2      | 0.0480**      | 0.0199        | 0.2303**<br>* | 0.1285*       | 0.1955*       | -0.1749*      | 0.0848        | 0.0944        | 0.1172        | -0.0938       | 0.0342        | 0.040<br>9      | -0.0164      |
| K2      | -0.0415       | 0.0305        | -0.0114       | 0.4060**<br>* | 0.1103        | -0.2242**     | 0.0331        | 0.2083**      | 0.2030*       | 0.1249*       | -0.0090       | 0.084<br>8      | -0.0632      |
| MG<br>2 | -0.0672       | 0.0017        | 0.0550        | -0.0942       | 0.4557**<br>* | 0.0803        | 0.0422        | -0.0432       | -0.0310       | 0.0917        | 0.0067        | 0.020<br>8      | 0.0383       |
| CA2     | -0.0859       | 0.0765        | -0.1348*      | -0.2209**     | -0.1738*      | 0.3187**<br>* | -0.2094**     | -0.2086**     | -0.2325**     | 0.1092        | -0.1478*      | -<br>0.023<br>2 | 0.0816       |
| NA2     | -0.0080       | -0.0731       | 0.0052        | -0.1474*      | 0.2105**      | 0.0375        | 0.4026**<br>* | 0.0713        | 0.0415        | 0.0109        | 0.1002        | -<br>0.030<br>2 | -0.0177      |
| FE2     | 0.0652        | 0.0321        | 0.0552        | 0.0666        | 0.2126        | -0.1189       | 0.1264        | 0.2721**<br>* | 0.2872**<br>* | 0.1290*       | 0.1099        | 0.064<br>4      | -0.1364*     |
| AL2     | 0.0641        | 0.0371        | 0.0576        | 0.0534        | 0.2129**      | -0.1209       | 0.1150        | 0.2687**<br>* | 0.2908**<br>* | 0.1154        | 0.1229        | 0.052<br>4      | -0.1470*     |
| MN<br>2 | 0.0120        | 0.1283*       | -0.1298*      | 0.0605        | -0.1709*      | -0.0240       | -0.1383*      | 0.0512        | 0.0254        | 0.3479**<br>* | -0.1317*      | 0.068<br>8      | 0.0582       |
| B2      | -0.0461       | 0.0417        | 0.0374        | 0.0696        | 0.1796*       | -0.0218       | 0.1282*       | -0.0195       | 0.0148        | 0.0805        | 0.4417**<br>* | 0.061<br>6      | 0.0023       |
| CU2     | 0.0517        | -0.0193       | -0.0359       | -0.1061       | 0.1364*       | -0.0793       | -0.0229       | 0.0436        | 0.0237        | -0.0297       | -0.0117       | -<br>0.019<br>9 | -0.1006      |
| ZN2     | -0.0397       | -0.0467       | 0.0253        | -0.0009       | 0.0309        | -0.0304       | -0.0619       | -0.0202       | -0.0184       | 0.0509        | -0.1072       | -<br>0.054<br>6 | 0.2086*<br>* |

1 Significant at  $\leq 0.0001$  (\*\*\*) 0.001 (\*\*) and 0.05 (\*).

2

- 1 Supplemental Table 4: Nutrient ratios associated with symptomatic (Symp) or non  
 2 symptomatic (No Symp) plants in 2015 and 2016

|       | 2015    |         | 2016    |         |
|-------|---------|---------|---------|---------|
|       | Symp    | No Symp | Symp    | No Symp |
| Mg/Ca | 0.37*   | 0.26    | 0.24*   | 0.34    |
| Al/Fe | 0.59*   | 0.6     | 0.66    | 0.65    |
| Al/Mg | 377.27* | 304.618 | 457.11* | 375.13  |
| Mg/K  | 0.99*   | 0.73    | 1.37*   | 1.18    |
| Mg/N  | 0.43*   | 0.28    | 0.64*   | 0.51    |
| N/Na  | 134.40* | 91.2    | 46.60*  | 34.16   |
| Na/K  | 0.03*   | 0.02    | 0.08    | 0.07    |
| Na/Mg | 0.03    | 0.03    | 0.07*   | 0.05    |

- 3 \* indicates significant at P = 0.05

4

1 Supplemental Table 5: SNPs associated with Mg, Na, marginal chlorosis (MC), stunting  
 2 (SL), and symptoms in 2015 (year 1) and 2016 (year 2) using Thompson Seedless gene  
 3 annotation.

| Ion | SNP         | Chromosome | Position | Major Allele Frequency | SNP effect | FDR Adjusted P-values | Year |
|-----|-------------|------------|----------|------------------------|------------|-----------------------|------|
| MC  | S1 17012584 | 1          | 17012584 | 0.32489451             | 0.22659066 | 0.01667885            | 1    |
|     | S3 149721   | 3          | 149721   | 0.21308017             | 0.33281749 | 0.00056555            | 1    |
|     | S3 265316   | 3          | 265316   | 0.32700422             | 0.26375046 | 0.02374226            | 1    |
|     | S3 921272   | 3          | 921272   | 0.21729958             | 0.25154293 | 0.0046545             | 1    |
|     | S3 951268   | 3          | 951268   | 0.33966245             | 0.21896912 | 0.02403079            | 1    |
|     | S3 951388   | 3          | 951388   | 0.33122363             | 0.22961638 | 0.02847315            | 1    |
|     | S3 1940787  | 3          | 1940787  | 0.33333333             | 0.23369988 | 0.02403079            | 1    |
|     | S3 2800042  | 3          | 2800042  | 0.21729958             | 0.24541523 | 0.0055526             | 1    |
|     | S3 3366649  | 3          | 3366649  | 0.23628692             | 0.26617543 | 0.00243863            | 1    |
|     | S3 3366650  | 3          | 3366650  | 0.25316456             | 0.29170471 | 0.00056555            | 1    |
|     | S3 3708527  | 3          | 3708527  | 0.20886076             | 0.25551943 | 0.01667885            | 1    |
|     | S3 3762073  | 3          | 3762073  | 0.35232068             | 0.23271696 | 0.03941491            | 1    |
|     | S3 4305461  | 3          | 4305461  | 0.33755274             | 0.25830352 | 0.02283101            | 1    |
|     | S3 5273832  | 3          | 5273832  | 0.28691983             | 0.40386373 | 0.00019026            | 1    |
|     | S3 5336687  | 3          | 5336687  | 0.2257384              | 0.24659421 | 0.01667885            | 1    |
|     | S3 5569343  | 3          | 5569343  | 0.33544304             | 0.32242211 | 0.0025915             | 1    |
|     | S3 7859939  | 3          | 7859939  | 0.34388186             | 0.22103727 | 0.04314381            | 1    |
|     | S3 8105992  | 3          | 8105992  | 0.32700422             | 0.24961136 | 0.03941491            | 1    |
|     | S3 8106968  | 3          | 8106968  | 0.32911392             | 0.25310763 | 0.03941491            | 1    |
|     | S3 8107007  | 3          | 8107007  | 0.32489451             | 0.25282443 | 0.03941491            | 1    |
|     | S3 8415247  | 3          | 8415247  | 0.21518987             | 0.20905837 | 0.01012007            | 1    |
|     | S3 11599143 | 3          | 11599143 | 0.33966245             | 0.31090086 | 0.0025915             | 1    |
|     | S3 12359712 | 3          | 12359712 | 0.21097046             | 0.24237338 | 0.02403079            | 1    |
|     | S3 13316810 | 3          | 13316810 | 0.32911392             | 0.25657243 | 0.02746531            | 1    |
|     | S3 13577682 | 3          | 13577682 | 0.33544304             | 0.30991258 | 0.0055526             | 1    |
|     | S3 13577823 | 3          | 13577823 | 0.10759494             | -0.2410146 | 0.0226152             | 1    |
|     | S3 13598294 | 3          | 13598294 | 0.33544304             | 0.21280628 | 0.02403079            | 1    |
|     | S3 14277010 | 3          | 14277010 | 0.33966245             | 0.22315704 | 0.03941491            | 1    |
|     | S3 14277018 | 3          | 14277018 | 0.33966245             | 0.22315704 | 0.03941491            | 1    |
|     | S3 14422878 | 3          | 14422878 | 0.21308017             | 0.26616849 | 0.01022214            | 1    |
|     | S3 14422903 | 3          | 14422903 | 0.33122363             | 0.25380778 | 0.02361311            | 1    |
|     | S3 14537967 | 3          | 14537967 | 0.26582278             | 0.29221882 | 0.00181432            | 1    |

|  |              |    |          |            |            |            |   |
|--|--------------|----|----------|------------|------------|------------|---|
|  | S3_15151065  | 3  | 15151065 | 0.20886076 | 0.26874619 | 0.00060935 | 1 |
|  | S3_17285477  | 3  | 17285477 | 0.24472574 | -0.1779894 | 0.02418664 | 1 |
|  | S3_18408625  | 3  | 18408625 | 0.33544304 | 0.29786181 | 0.00675532 | 1 |
|  | S3_18664986  | 3  | 18664986 | 0.33544304 | 0.29837124 | 0.001007   | 1 |
|  | S3_18665025  | 3  | 18665025 | 0.33544304 | 0.29837124 | 0.001007   | 1 |
|  | S3_18838966  | 3  | 18838966 | 0.21097046 | 0.23317317 | 0.02844832 | 1 |
|  | S3_21716906  | 3  | 21716906 | 0.33122363 | 0.29674515 | 0.01084248 | 1 |
|  | S3_21825918  | 3  | 21825918 | 0.22995781 | 0.30575095 | 0.00041602 | 1 |
|  | S3_21825925  | 3  | 21825925 | 0.22995781 | 0.30575095 | 0.00041602 | 1 |
|  | S3_21825966  | 3  | 21825966 | 0.25738397 | 0.30791427 | 0.00039485 | 1 |
|  | S3_22457867  | 3  | 22457867 | 0.20675105 | 0.23251597 | 0.01220527 | 1 |
|  | S3_23241926  | 3  | 23241926 | 0.33966245 | 0.26967825 | 0.01136632 | 1 |
|  | S3_23242021  | 3  | 23242021 | 0.33544304 | 0.22987758 | 0.03084853 | 1 |
|  | S3_23242056  | 3  | 23242056 | 0.33544304 | 0.22987758 | 0.03084853 | 1 |
|  | S3_23257153  | 3  | 23257153 | 0.35021097 | 0.25169307 | 0.02371533 | 1 |
|  | S10_9101907  | 10 | 9101907  | 0.32278481 | 0.24333347 | 0.01245173 | 1 |
|  | S10_9101926  | 10 | 9101926  | 0.32278481 | 0.24333347 | 0.01245173 | 1 |
|  | S10_21319026 | 10 | 21319026 | 0.2721519  | 0.24909282 | 0.02403079 | 1 |
|  | S10_21319060 | 10 | 21319060 | 0.2721519  | 0.24909282 | 0.02403079 | 1 |
|  | S11_16654495 | 11 | 16654495 | 0.33122363 | 0.23112125 | 0.00235    | 1 |
|  | S12_17501478 | 12 | 17501478 | 0.30801688 | 0.22422583 | 0.02403079 | 1 |
|  | S14_22076746 | 14 | 22076746 | 0.26160338 | 0.17652429 | 0.02847315 | 1 |
|  | S18_19991790 | 18 | 19991790 | 0.29535865 | 0.24715794 | 0.01942903 | 1 |
|  | S18_19991805 | 18 | 19991805 | 0.29535865 | 0.24715794 | 0.01942903 | 1 |
|  | S18_29587371 | 18 | 29587371 | 0.28902954 | -0.2016059 | 0.0067376  | 1 |
|  | S1_17928457  | 1  | 17928457 | 0.21097046 | 0.24985258 | 0.01447473 | 2 |
|  | S1_17928525  | 1  | 17928525 | 0.20675105 | 0.22616589 | 0.02473869 | 2 |
|  | S2_13405930  | 2  | 13405930 | 0.30801688 | 0.1964977  | 0.02794864 | 2 |
|  | S3_149721    | 3  | 149721   | 0.21308017 | 0.28332339 | 0.00319514 | 2 |
|  | S3_265316    | 3  | 265316   | 0.32700422 | 0.22134437 | 0.04671235 | 2 |
|  | S3_951268    | 3  | 951268   | 0.33966245 | 0.20430519 | 0.01928891 | 2 |
|  | S3_951388    | 3  | 951388   | 0.33122363 | 0.23582758 | 0.01293689 | 2 |
|  | S3_1940825   | 3  | 1940825  | 0.21940928 | 0.22291945 | 0.01609706 | 2 |
|  | S3_2800042   | 3  | 2800042  | 0.21729958 | 0.21037971 | 0.01447473 | 2 |
|  | S3_3366649   | 3  | 3366649  | 0.23628692 | 0.23660555 | 0.00558214 | 2 |
|  | S3_3366650   | 3  | 3366650  | 0.25316456 | 0.24592358 | 0.00319514 | 2 |
|  | S3_3708527   | 3  | 3708527  | 0.20886076 | 0.22094818 | 0.02794864 | 2 |
|  | S3_3755967   | 3  | 3755967  | 0.20886076 | 0.20468927 | 0.04746561 | 2 |
|  | S3_4805266   | 3  | 4805266  | 0.33333333 | 0.19529754 | 0.04746561 | 2 |
|  | S3_5273832   | 3  | 5273832  | 0.28691983 | 0.29069364 | 0.0060768  | 2 |

|  |              |    |          |            |            |            |   |
|--|--------------|----|----------|------------|------------|------------|---|
|  | S3 5336687   | 3  | 5336687  | 0.2257384  | 0.28237956 | 0.00319514 | 2 |
|  | S3_5569343   | 3  | 5569343  | 0.33544304 | 0.25697467 | 0.01447473 | 2 |
|  | S3 8415247   | 3  | 8415247  | 0.21518987 | 0.1714754  | 0.02918022 | 2 |
|  | S3 10836535  | 3  | 10836535 | 0.22995781 | 0.16520756 | 0.04452054 | 2 |
|  | S3 11143564  | 3  | 11143564 | 0.19620253 | 0.23030251 | 0.02794864 | 2 |
|  | S3 11599143  | 3  | 11599143 | 0.33966245 | 0.25913183 | 0.01293689 | 2 |
|  | S3 12359712  | 3  | 12359712 | 0.21097046 | 0.21291395 | 0.03528829 | 2 |
|  | S3 13577682  | 3  | 13577682 | 0.33544304 | 0.24854465 | 0.0194313  | 2 |
|  | S3 14422878  | 3  | 14422878 | 0.21308017 | 0.23478359 | 0.01447473 | 2 |
|  | S3 14422903  | 3  | 14422903 | 0.33122363 | 0.27046072 | 0.00453437 | 2 |
|  | S3 14422928  | 3  | 14422928 | 0.32489451 | 0.21364317 | 0.01810773 | 2 |
|  | S3 14537967  | 3  | 14537967 | 0.26582278 | 0.23418652 | 0.01447473 | 2 |
|  | S3 15151065  | 3  | 15151065 | 0.20886076 | 0.20459273 | 0.01447473 | 2 |
|  | S3 18408625  | 3  | 18408625 | 0.33544304 | 0.23876115 | 0.02473869 | 2 |
|  | S3 18664986  | 3  | 18664986 | 0.33544304 | 0.22846081 | 0.01447473 | 2 |
|  | S3 18665025  | 3  | 18665025 | 0.33544304 | 0.22846081 | 0.01447473 | 2 |
|  | S3 21716906  | 3  | 21716906 | 0.33122363 | 0.24464525 | 0.02473869 | 2 |
|  | S3 21762832  | 3  | 21762832 | 0.23628692 | 0.19296171 | 0.02473869 | 2 |
|  | S3 21825918  | 3  | 21825918 | 0.22995781 | 0.25053381 | 0.00319514 | 2 |
|  | S3 21825925  | 3  | 21825925 | 0.22995781 | 0.25053381 | 0.00319514 | 2 |
|  | S3 21825966  | 3  | 21825966 | 0.25738397 | 0.25288375 | 0.00319514 | 2 |
|  | S3 23241926  | 3  | 23241926 | 0.33966245 | 0.22078443 | 0.02794864 | 2 |
|  | S3 23257153  | 3  | 23257153 | 0.35021097 | 0.20963799 | 0.04746561 | 2 |
|  | S10 9101907  | 10 | 9101907  | 0.32278481 | 0.22247125 | 0.01447473 | 2 |
|  | S10 9101926  | 10 | 9101926  | 0.32278481 | 0.22247125 | 0.01447473 | 2 |
|  | S10 21319026 | 10 | 21319026 | 0.2721519  | 0.22299517 | 0.02918022 | 2 |
|  | S10 21319060 | 10 | 21319060 | 0.2721519  | 0.22299517 | 0.02918022 | 2 |
|  | S16 8791589  | 16 | 8791589  | 0.26582278 | 0.18539035 | 0.01614494 | 2 |
|  | S18 29587371 | 18 | 29587371 | 0.28902954 | -0.1717003 | 0.01822124 | 2 |
|  | S18 32070700 | 18 | 32070700 | 0.24683544 | 0.18323085 | 0.0194313  | 2 |
|  | S18 32070713 | 18 | 32070713 | 0.25316456 | 0.19130682 | 0.01447473 | 2 |
|  | S19 15553095 | 19 | 15553095 | 0.22362869 | 0.1971494  | 0.0194313  | 2 |
|  | S1 17928457  | 1  | 17928457 | 0.21097046 | 0.24985258 | 0.01447473 | 2 |
|  | S1 17928525  | 1  | 17928525 | 0.20675105 | 0.22616589 | 0.02473869 | 2 |
|  | S2 13405930  | 2  | 13405930 | 0.30801688 | 0.1964977  | 0.02794864 | 2 |
|  | S3 149721    | 3  | 149721   | 0.21308017 | 0.28332339 | 0.00319514 | 2 |
|  | S3 265316    | 3  | 265316   | 0.32700422 | 0.22134437 | 0.04671235 | 2 |
|  | S3 951268    | 3  | 951268   | 0.33966245 | 0.20430519 | 0.01928891 | 2 |
|  | S3 951388    | 3  | 951388   | 0.33122363 | 0.23582758 | 0.01293689 | 2 |
|  | S3 1940825   | 3  | 1940825  | 0.21940928 | 0.22291945 | 0.01609706 | 2 |

|    |              |    |          |            |            |            |   |
|----|--------------|----|----------|------------|------------|------------|---|
|    | S3_2800042   | 3  | 2800042  | 0.21729958 | 0.21037971 | 0.01447473 | 2 |
|    | S3_3366649   | 3  | 3366649  | 0.23628692 | 0.23660555 | 0.00558214 | 2 |
|    | S3_3366650   | 3  | 3366650  | 0.25316456 | 0.24592358 | 0.00319514 | 2 |
|    | S3_3708527   | 3  | 3708527  | 0.20886076 | 0.22094818 | 0.02794864 | 2 |
|    | S3_3755967   | 3  | 3755967  | 0.20886076 | 0.20468927 | 0.04746561 | 2 |
|    | S3_4805266   | 3  | 4805266  | 0.33333333 | 0.19529754 | 0.04746561 | 2 |
|    | S3_5273832   | 3  | 5273832  | 0.28691983 | 0.29069364 | 0.0060768  | 2 |
|    | S3_5336687   | 3  | 5336687  | 0.2257384  | 0.28237956 | 0.00319514 | 2 |
|    | S3_5569343   | 3  | 5569343  | 0.33544304 | 0.25697467 | 0.01447473 | 2 |
|    | S3_8415247   | 3  | 8415247  | 0.21518987 | 0.1714754  | 0.02918022 | 2 |
|    | S3_10836535  | 3  | 10836535 | 0.22995781 | 0.16520756 | 0.04452054 | 2 |
|    | S3_11143564  | 3  | 11143564 | 0.19620253 | 0.23030251 | 0.02794864 | 2 |
|    | S3_11599143  | 3  | 11599143 | 0.33966245 | 0.25913183 | 0.01293689 | 2 |
|    | S3_12359712  | 3  | 12359712 | 0.21097046 | 0.21291395 | 0.03528829 | 2 |
|    | S3_13577682  | 3  | 13577682 | 0.33544304 | 0.24854465 | 0.0194313  | 2 |
|    | S3_14422878  | 3  | 14422878 | 0.21308017 | 0.23478359 | 0.01447473 | 2 |
|    | S3_14422903  | 3  | 14422903 | 0.33122363 | 0.27046072 | 0.00453437 | 2 |
|    | S3_14422928  | 3  | 14422928 | 0.32489451 | 0.21364317 | 0.01810773 | 2 |
|    | S3_14537967  | 3  | 14537967 | 0.26582278 | 0.23418652 | 0.01447473 | 2 |
|    | S3_15151065  | 3  | 15151065 | 0.20886076 | 0.20459273 | 0.01447473 | 2 |
|    | S3_18408625  | 3  | 18408625 | 0.33544304 | 0.23876115 | 0.02473869 | 2 |
|    | S3_18664986  | 3  | 18664986 | 0.33544304 | 0.22846081 | 0.01447473 | 2 |
|    | S3_18665025  | 3  | 18665025 | 0.33544304 | 0.22846081 | 0.01447473 | 2 |
|    | S3_21716906  | 3  | 21716906 | 0.33122363 | 0.24464525 | 0.02473869 | 2 |
|    | S3_21762832  | 3  | 21762832 | 0.23628692 | 0.19296171 | 0.02473869 | 2 |
|    | S3_21825918  | 3  | 21825918 | 0.22995781 | 0.25053381 | 0.00319514 | 2 |
|    | S3_21825925  | 3  | 21825925 | 0.22995781 | 0.25053381 | 0.00319514 | 2 |
|    | S3_21825966  | 3  | 21825966 | 0.25738397 | 0.25288375 | 0.00319514 | 2 |
|    | S3_23241926  | 3  | 23241926 | 0.33966245 | 0.22078443 | 0.02794864 | 2 |
|    | S3_23257153  | 3  | 23257153 | 0.35021097 | 0.20963799 | 0.04746561 | 2 |
|    | S10_9101907  | 10 | 9101907  | 0.32278481 | 0.22247125 | 0.01447473 | 2 |
|    | S10_9101926  | 10 | 9101926  | 0.32278481 | 0.22247125 | 0.01447473 | 2 |
|    | S10_21319026 | 10 | 21319026 | 0.2721519  | 0.22299517 | 0.02918022 | 2 |
|    | S10_21319060 | 10 | 21319060 | 0.2721519  | 0.22299517 | 0.02918022 | 2 |
|    | S16_8791589  | 16 | 8791589  | 0.26582278 | 0.18539035 | 0.01614494 | 2 |
|    | S18_29587371 | 18 | 29587371 | 0.28902954 | -0.1717003 | 0.01822124 | 2 |
|    | S18_32070700 | 18 | 32070700 | 0.24683544 | 0.18323085 | 0.0194313  | 2 |
|    | S18_32070713 | 18 | 32070713 | 0.25316456 | 0.19130682 | 0.01447473 | 2 |
|    | S19_15553095 | 19 | 15553095 | 0.22362869 | 0.1971494  | 0.0194313  | 2 |
| Mg | S3_21825918  | 3  | 21825918 | 0.22995781 | 0.06990251 | 0.00678768 | 1 |

|    |              |    |          |            |            |            |   |
|----|--------------|----|----------|------------|------------|------------|---|
|    | S3_21825925  | 3  | 21825925 | 0.22995781 | 0.06990251 | 0.00678768 | 1 |
|    | S3_21825966  | 3  | 21825966 | 0.25738397 | 0.06540355 | 0.01138848 | 1 |
|    | S3_3366650   | 3  | 3366650  | 0.25316456 | 0.06020626 | 0.04001324 | 1 |
| Na | S11_16152632 | 11 | 16152632 | 0.30168776 | -0.0858618 | 0.04865443 | 1 |
|    | S13_13525320 | 13 | 13525320 | 0.33966245 | -0.1241383 | 0.04865443 | 1 |
|    | S13_13525321 | 13 | 13525321 | 0.33966245 | -0.1241383 | 0.04865443 | 1 |
|    | S13_13525326 | 13 | 13525326 | 0.33966245 | -0.1241383 | 0.04865443 | 1 |
|    | S18_25745134 | 18 | 25745134 | 0.33122363 | 0.13522212 | 0.04865443 | 1 |
|    | S18_25745143 | 18 | 25745143 | 0.33122363 | 0.13522212 | 0.04865443 | 1 |
|    | S11_1383030  | 11 | 1383030  | 0.34599156 | 0.11948124 | 0.01150161 | 2 |
|    | S11_11635675 | 11 | 11635675 | 0.35021097 | 0.12785527 | 0.01150161 | 2 |
|    | S11_16152632 | 11 | 16152632 | 0.30168776 | -0.0864402 | 0.01150161 | 2 |
|    | S11_19913960 | 11 | 19913960 | 0.34599156 | -0.0874211 | 0.0107111  | 2 |
|    | S12_14804000 | 12 | 14804000 | 0.21097046 | -0.1089728 | 0.01725993 | 2 |
|    | S18_25745134 | 18 | 25745134 | 0.33122363 | 0.12717595 | 0.01298471 | 2 |
|    | S18_25745143 | 18 | 25745143 | 0.33122363 | 0.12717595 | 0.01298471 | 2 |
| SL | S3_149721    | 3  | 149721   | 0.21308017 | 0.33946165 | 0.00321538 | 1 |
|    | S3_265316    | 3  | 265316   | 0.32700422 | 0.28700503 | 0.02325618 | 1 |
|    | S3_921272    | 3  | 921272   | 0.21729958 | 0.26027    | 0.01181936 | 1 |
|    | S3_2032882   | 3  | 2032882  | 0.20886076 | 0.2281167  | 0.03281731 | 1 |
|    | S3_2032883   | 3  | 2032883  | 0.21097046 | 0.2304321  | 0.03838502 | 1 |
|    | S3_2032939   | 3  | 2032939  | 0.20253165 | 0.23181374 | 0.03281731 | 1 |
|    | S3_2800042   | 3  | 2800042  | 0.21729958 | 0.23180025 | 0.03281731 | 1 |
|    | S3_3184421   | 3  | 3184421  | 0.33333333 | 0.18195281 | 0.0447322  | 1 |
|    | S3_3366650   | 3  | 3366650  | 0.25316456 | 0.22682294 | 0.04048876 | 1 |
|    | S3_3708527   | 3  | 3708527  | 0.20886076 | 0.2949255  | 0.01152956 | 1 |
|    | S3_4784875   | 3  | 4784875  | 0.20675105 | 0.22838344 | 0.03281731 | 1 |
|    | S3_5273832   | 3  | 5273832  | 0.28691983 | 0.36704589 | 0.00321538 | 1 |
|    | S3_5569343   | 3  | 5569343  | 0.33544304 | 0.30514975 | 0.01795723 | 1 |
|    | S3_5755118   | 3  | 5755118  | 0.35232068 | 0.18595655 | 0.0447322  | 1 |
|    | S3_10174220  | 3  | 10174220 | 0.20675105 | 0.25660224 | 0.03281731 | 1 |
|    | S3_11599143  | 3  | 11599143 | 0.33966245 | 0.30218    | 0.01337565 | 1 |
|    | S3_12359712  | 3  | 12359712 | 0.21097046 | 0.27459279 | 0.01969509 | 1 |
|    | S3_13316810  | 3  | 13316810 | 0.32911392 | 0.29200147 | 0.01969509 | 1 |
|    | S3_13577682  | 3  | 13577682 | 0.33544304 | 0.29973869 | 0.02117013 | 1 |
|    | S3_14422878  | 3  | 14422878 | 0.21308017 | 0.2829439  | 0.01485584 | 1 |
|    | S3_14537967  | 3  | 14537967 | 0.26582278 | 0.25758042 | 0.03117463 | 1 |
|    | S3_14638969  | 3  | 14638969 | 0.20464135 | 0.23848655 | 0.03281731 | 1 |
|    | S3_15151065  | 3  | 15151065 | 0.20886076 | 0.24392656 | 0.01255123 | 1 |
|    | S3_18408625  | 3  | 18408625 | 0.33544304 | 0.29347872 | 0.02117013 | 1 |

|  |              |    |          |            |            |            |   |
|--|--------------|----|----------|------------|------------|------------|---|
|  | S3 18664986  | 3  | 18664986 | 0.33544304 | 0.24077264 | 0.04425129 | 1 |
|  | S3_18665025  | 3  | 18665025 | 0.33544304 | 0.24077264 | 0.04425129 | 1 |
|  | S3 18838966  | 3  | 18838966 | 0.21097046 | 0.24791605 | 0.03838502 | 1 |
|  | S3 21716906  | 3  | 21716906 | 0.33122363 | 0.32520194 | 0.01152956 | 1 |
|  | S3 21825918  | 3  | 21825918 | 0.22995781 | 0.28060315 | 0.00766035 | 1 |
|  | S3 21825925  | 3  | 21825925 | 0.22995781 | 0.28060315 | 0.00766035 | 1 |
|  | S3 21825966  | 3  | 21825966 | 0.25738397 | 0.28325842 | 0.00600405 | 1 |
|  | S3 22457867  | 3  | 22457867 | 0.20675105 | 0.22388941 | 0.04048876 | 1 |
|  | S3 23241926  | 3  | 23241926 | 0.33966245 | 0.2618259  | 0.03281731 | 1 |
|  | S3 23242021  | 3  | 23242021 | 0.33544304 | 0.25010719 | 0.03281731 | 1 |
|  | S3 23242056  | 3  | 23242056 | 0.33544304 | 0.25010719 | 0.03281731 | 1 |
|  | S3 23257153  | 3  | 23257153 | 0.35021097 | 0.25580925 | 0.03923276 | 1 |
|  | S18 29587371 | 18 | 29587371 | 0.28902954 | -0.2485896 | 0.00321538 | 1 |
|  | S1 17928457  | 1  | 17928457 | 0.21097046 | 0.24871813 | 0.02812041 | 2 |
|  | S1 17928525  | 1  | 17928525 | 0.20675105 | 0.22914848 | 0.04045198 | 2 |
|  | S2 13405930  | 2  | 13405930 | 0.30801688 | 0.20421323 | 0.03311981 | 2 |
|  | S3 149721    | 3  | 149721   | 0.21308017 | 0.32309111 | 0.00090024 | 2 |
|  | S3 265316    | 3  | 265316   | 0.32700422 | 0.25904701 | 0.02812041 | 2 |
|  | S3 921272    | 3  | 921272   | 0.21729958 | 0.22576551 | 0.01196371 | 2 |
|  | S3 951268    | 3  | 951268   | 0.33966245 | 0.21150045 | 0.02812041 | 2 |
|  | S3 951388    | 3  | 951388   | 0.33122363 | 0.21596282 | 0.03985745 | 2 |
|  | S3 1066739   | 3  | 1066739  | 0.21518987 | 0.19176613 | 0.02812041 | 2 |
|  | S3_1066750   | 3  | 1066750  | 0.20886076 | 0.19417887 | 0.02812041 | 2 |
|  | S3 1940787   | 3  | 1940787  | 0.33333333 | 0.22666266 | 0.02931871 | 2 |
|  | S3 1940825   | 3  | 1940825  | 0.21940928 | 0.21754486 | 0.03311981 | 2 |
|  | S3 2019299   | 3  | 2019299  | 0.19409283 | 0.22131001 | 0.04059856 | 2 |
|  | S3 2032882   | 3  | 2032882  | 0.20886076 | 0.19446222 | 0.04455843 | 2 |
|  | S3 2032939   | 3  | 2032939  | 0.20253165 | 0.19890423 | 0.04059856 | 2 |
|  | S3 2800042   | 3  | 2800042  | 0.21729958 | 0.23040632 | 0.00928362 | 2 |
|  | S3 3366649   | 3  | 3366649  | 0.23628692 | 0.25272535 | 0.00423453 | 2 |
|  | S3 3366650   | 3  | 3366650  | 0.25316456 | 0.27414261 | 0.00121981 | 2 |
|  | S3 3708527   | 3  | 3708527  | 0.20886076 | 0.28292448 | 0.00423453 | 2 |
|  | S3 4305461   | 3  | 4305461  | 0.33755274 | 0.24877468 | 0.02812041 | 2 |
|  | S3 4791541   | 3  | 4791541  | 0.20464135 | 0.20719061 | 0.03690097 | 2 |
|  | S3 4926121   | 3  | 4926121  | 0.28691983 | 0.17510822 | 0.03550842 | 2 |
|  | S3 4926123   | 3  | 4926123  | 0.28691983 | 0.17510822 | 0.03550842 | 2 |
|  | S3 5273832   | 3  | 5273832  | 0.28691983 | 0.38140452 | 0.00018347 | 2 |
|  | S3 5336687   | 3  | 5336687  | 0.2257384  | 0.29031631 | 0.00147413 | 2 |
|  | S3 5569343   | 3  | 5569343  | 0.33544304 | 0.31700306 | 0.00423453 | 2 |
|  | S3 5755118   | 3  | 5755118  | 0.35232068 | 0.16681274 | 0.03938057 | 2 |

|  |              |    |          |            |            |            |   |
|--|--------------|----|----------|------------|------------|------------|---|
|  | S3_7859939   | 3  | 7859939  | 0.34388186 | 0.21706591 | 0.04059856 | 2 |
|  | S3_8105992   | 3  | 8105992  | 0.32700422 | 0.24657795 | 0.0382301  | 2 |
|  | S3_8106968   | 3  | 8106968  | 0.32911392 | 0.24793745 | 0.03938057 | 2 |
|  | S3_8107007   | 3  | 8107007  | 0.32489451 | 0.24728348 | 0.03985745 | 2 |
|  | S3_8415247   | 3  | 8415247  | 0.21518987 | 0.21532144 | 0.00472126 | 2 |
|  | S3_10174220  | 3  | 10174220 | 0.20675105 | 0.22145334 | 0.03938057 | 2 |
|  | S3_10836535  | 3  | 10836535 | 0.22995781 | 0.18150863 | 0.02812041 | 2 |
|  | S3_11599143  | 3  | 11599143 | 0.33966245 | 0.31573881 | 0.00234523 | 2 |
|  | S3_12359712  | 3  | 12359712 | 0.21097046 | 0.26620894 | 0.00772624 | 2 |
|  | S3_13316810  | 3  | 13316810 | 0.32911392 | 0.25203148 | 0.02997139 | 2 |
|  | S3_13577682  | 3  | 13577682 | 0.33544304 | 0.30458901 | 0.00772299 | 2 |
|  | S3_13598294  | 3  | 13598294 | 0.33544304 | 0.20937041 | 0.02812041 | 2 |
|  | S3_14277010  | 3  | 14277010 | 0.33966245 | 0.21966695 | 0.03762031 | 2 |
|  | S3_14277018  | 3  | 14277018 | 0.33966245 | 0.21966695 | 0.03762031 | 2 |
|  | S3_14422878  | 3  | 14422878 | 0.21308017 | 0.26033418 | 0.00978336 | 2 |
|  | S3_14422903  | 3  | 14422903 | 0.33122363 | 0.2469158  | 0.02812041 | 2 |
|  | S3_14537967  | 3  | 14537967 | 0.26582278 | 0.27142637 | 0.00423453 | 2 |
|  | S3_14638969  | 3  | 14638969 | 0.20464135 | 0.20816951 | 0.03550368 | 2 |
|  | S3_15151065  | 3  | 15151065 | 0.20886076 | 0.25665943 | 0.00117259 | 2 |
|  | S3_18408625  | 3  | 18408625 | 0.33544304 | 0.29409045 | 0.00772624 | 2 |
|  | S3_18664986  | 3  | 18664986 | 0.33544304 | 0.24281331 | 0.01196371 | 2 |
|  | S3_18665025  | 3  | 18665025 | 0.33544304 | 0.24281331 | 0.01196371 | 2 |
|  | S3_18838966  | 3  | 18838966 | 0.21097046 | 0.23011363 | 0.02812041 | 2 |
|  | S3_21716906  | 3  | 21716906 | 0.33122363 | 0.29474037 | 0.00978336 | 2 |
|  | S3_21762832  | 3  | 21762832 | 0.23628692 | 0.20001132 | 0.03261204 | 2 |
|  | S3_21825918  | 3  | 21825918 | 0.22995781 | 0.30804543 | 0.00018347 | 2 |
|  | S3_21825925  | 3  | 21825925 | 0.22995781 | 0.30804543 | 0.00018347 | 2 |
|  | S3_21825966  | 3  | 21825966 | 0.25738397 | 0.30679038 | 0.00018347 | 2 |
|  | S3_22457867  | 3  | 22457867 | 0.20675105 | 0.23005432 | 0.00978336 | 2 |
|  | S3_23241926  | 3  | 23241926 | 0.33966245 | 0.26288037 | 0.01196371 | 2 |
|  | S3_23257153  | 3  | 23257153 | 0.35021097 | 0.2410554  | 0.02997139 | 2 |
|  | S10_9101907  | 10 | 9101907  | 0.32278481 | 0.22060387 | 0.02812041 | 2 |
|  | S10_9101926  | 10 | 9101926  | 0.32278481 | 0.22060387 | 0.02812041 | 2 |
|  | S10_21319026 | 10 | 21319026 | 0.2721519  | 0.26432832 | 0.00978336 | 2 |
|  | S10_21319060 | 10 | 21319060 | 0.2721519  | 0.26432832 | 0.00978336 | 2 |
|  | S10_28026244 | 10 | 28026244 | 0.33544304 | 0.19642459 | 0.0244633  | 2 |
|  | S11_16654495 | 11 | 16654495 | 0.33122363 | 0.17569753 | 0.03570541 | 2 |
|  | S12_17501478 | 12 | 17501478 | 0.30801688 | 0.22002896 | 0.0244633  | 2 |
|  | S16_8791589  | 16 | 8791589  | 0.26582278 | 0.18416558 | 0.02878896 | 2 |
|  | S18_19991790 | 18 | 19991790 | 0.29535865 | 0.26311194 | 0.00772299 | 2 |

|      |              |    |          |             |             |             |   |
|------|--------------|----|----------|-------------|-------------|-------------|---|
|      | S18_19991805 | 18 | 19991805 | 0.29535865  | 0.26311194  | 0.00772299  | 2 |
|      | S18_29587371 | 18 | 29587371 | 0.28902954  | -0.1907808  | 0.00883184  | 2 |
|      | S18_32070700 | 18 | 32070700 | 0.24683544  | 0.1767133   | 0.04059856  | 2 |
|      | S18_32070713 | 18 | 32070713 | 0.25316456  | 0.18260382  | 0.03261204  | 2 |
| Symp | S3_149721    | 3  | 149721   | 0.21308017  | 0.36419565  | 0.00149684  | 1 |
|      | S3_265316    | 3  | 265316   | 0.32700422  | 0.30184279  | 0.01730875  | 1 |
|      | S3_921272    | 3  | 921272   | 0.21729958  | 0.27182084  | 0.00837379  | 1 |
|      | S3_2032882   | 3  | 2032882  | 0.20886076  | 0.23990008  | 0.02443169  | 1 |
|      | S3_2032939   | 3  | 2032939  | 0.20253165  | 0.24436033  | 0.02423876  | 1 |
|      | S3_2800042   | 3  | 2800042  | 0.21729958  | 0.24640477  | 0.01730875  | 1 |
|      | S3_3366650   | 3  | 3366650  | 0.25316456  | 0.2561027   | 0.0149644   | 1 |
|      | S3_3708527   | 3  | 3708527  | 0.20886076  | 0.30823981  | 0.00837379  | 1 |
|      | S3_4784875   | 3  | 4784875  | 0.20675106  | 0.23123744  | 0.03253264  | 1 |
|      | S3_5273832   | 3  | 5273832  | 0.28691983  | 0.40843832  | 0.00149684  | 1 |
|      | S3_5569343   | 3  | 5569343  | 0.33544304  | 0.3260476   | 0.01079826  | 1 |
|      | S3_10174220  | 3  | 10174220 | 0.20675106  | 0.26783533  | 0.02443169  | 1 |
|      | S3_11599143  | 3  | 11599143 | 0.33966245  | 0.32413799  | 0.00837379  | 1 |
|      | S3_12359712  | 3  | 12359712 | 0.21097046  | 0.2890058   | 0.01200528  | 1 |
|      | S3_13316810  | 3  | 13316810 | 0.32911392  | 0.30502883  | 0.0149644   | 1 |
|      | S3_13577682  | 3  | 13577682 | 0.33544304  | 0.31692615  | 0.01528289  | 1 |
|      | S3_14422878  | 3  | 14422878 | 0.21308017  | 0.3000511   | 0.00837379  | 1 |
|      | S3_14537967  | 3  | 14537967 | 0.26582279  | 0.29158571  | 0.00837379  | 1 |
|      | S3_14638969  | 3  | 14638969 | 0.20464135  | 0.25152138  | 0.02131426  | 1 |
|      | S3_15151065  | 3  | 15151065 | 0.20886076  | 0.29015535  | 0.00149684  | 1 |
|      | S3_18408625  | 3  | 18408625 | 0.33544304  | 0.31060458  | 0.0149644   | 1 |
|      | S3_18664986  | 3  | 18664986 | 0.33544304  | 0.25486735  | 0.03238005  | 1 |
|      | S3_18665025  | 3  | 18665025 | 0.33544304  | 0.25486735  | 0.03238005  | 1 |
|      | S3_18838966  | 3  | 18838966 | 0.21097046  | 0.28444197  | 0.01149192  | 1 |
|      | S3_21716906  | 3  | 21716906 | 0.33122363  | 0.34071368  | 0.00837379  | 1 |
|      | S3_21825918  | 3  | 21825918 | 0.22995781  | 0.31010264  | 0.00186685  | 1 |
|      | S3_21825925  | 3  | 21825925 | 0.22995781  | 0.31010264  | 0.00186685  | 1 |
|      | S3_21825966  | 3  | 21825966 | 0.25738397  | 0.312007    | 0.00149684  | 1 |
|      | S3_22457867  | 3  | 22457867 | 0.20675106  | 0.26453392  | 0.00890808  | 1 |
|      | S3_23241926  | 3  | 23241926 | 0.33966245  | 0.28227404  | 0.02164565  | 1 |
|      | S3_23242021  | 3  | 23242021 | 0.33544304  | 0.29320071  | 0.00837379  | 1 |
|      | S3_23242056  | 3  | 23242056 | 0.33544304  | 0.29320071  | 0.00837379  | 1 |
|      | S3_23257153  | 3  | 23257153 | 0.35021097  | 0.2673552   | 0.04043637  | 1 |
|      | S11_16654495 | 11 | 16654495 | 0.33122363  | 0.22964664  | 0.01019004  | 1 |
|      | S18_29587371 | 18 | 29587371 | 0.28902954  | -0.2316787  | 0.00593366  | 1 |
|      | S1_17928457  | 1  | 17928457 | 0.210970464 | 0.248718128 | 0.028120409 | 2 |

|  |             |   |          |             |             |             |   |
|--|-------------|---|----------|-------------|-------------|-------------|---|
|  | S1_17928525 | 1 | 17928525 | 0.206751055 | 0.229148482 | 0.040451983 | 2 |
|  | S2_13405930 | 2 | 13405930 | 0.308016878 | 0.204213226 | 0.033119807 | 2 |
|  | S3_21825966 | 3 | 21825966 | 0.257383966 | 0.306790375 | 0.00018347  | 2 |
|  | S3_5273832  | 3 | 5273832  | 0.286919831 | 0.381404519 | 0.00018347  | 2 |
|  | S3_21825918 | 3 | 21825918 | 0.229957806 | 0.308045432 | 0.00018347  | 2 |
|  | S3_21825925 | 3 | 21825925 | 0.229957806 | 0.308045432 | 0.00018347  | 2 |
|  | S3_149721   | 3 | 149721   | 0.213080169 | 0.32309111  | 0.00090024  | 2 |
|  | S3_15151065 | 3 | 15151065 | 0.208860759 | 0.256659427 | 0.001172592 | 2 |
|  | S3_3366650  | 3 | 3366650  | 0.253164557 | 0.274142613 | 0.001219805 | 2 |
|  | S3_5336687  | 3 | 5336687  | 0.225738397 | 0.290316307 | 0.001474127 | 2 |
|  | S3_11599143 | 3 | 11599143 | 0.339662447 | 0.315738812 | 0.002345231 | 2 |
|  | S3_5569343  | 3 | 5569343  | 0.335443038 | 0.317003058 | 0.004234527 | 2 |
|  | S3_3708527  | 3 | 3708527  | 0.208860759 | 0.282924477 | 0.004234527 | 2 |
|  | S3_3366649  | 3 | 3366649  | 0.23628692  | 0.252725345 | 0.004234527 | 2 |
|  | S3_14537967 | 3 | 14537967 | 0.265822785 | 0.27142637  | 0.004234527 | 2 |
|  | S3_8415247  | 3 | 8415247  | 0.215189873 | 0.215321441 | 0.004721257 | 2 |
|  | S3_13577682 | 3 | 13577682 | 0.335443038 | 0.304589007 | 0.007722992 | 2 |
|  | S3_12359712 | 3 | 12359712 | 0.210970464 | 0.266208945 | 0.007726242 | 2 |
|  | S3_18408625 | 3 | 18408625 | 0.335443038 | 0.294090452 | 0.007726242 | 2 |
|  | S3_2800042  | 3 | 2800042  | 0.217299578 | 0.230406322 | 0.009283624 | 2 |
|  | S3_14422878 | 3 | 14422878 | 0.213080169 | 0.260334179 | 0.009783359 | 2 |
|  | S3_22457867 | 3 | 22457867 | 0.206751055 | 0.230054315 | 0.009783359 | 2 |
|  | S3_21716906 | 3 | 21716906 | 0.331223629 | 0.294740368 | 0.009783359 | 2 |
|  | S3_921272   | 3 | 921272   | 0.217299578 | 0.225765512 | 0.011963712 | 2 |
|  | S3_23241926 | 3 | 23241926 | 0.339662447 | 0.262880368 | 0.011963712 | 2 |
|  | S3_18664986 | 3 | 18664986 | 0.335443038 | 0.242813308 | 0.011963712 | 2 |
|  | S3_18665025 | 3 | 18665025 | 0.335443038 | 0.242813308 | 0.011963712 | 2 |
|  | S3_14422903 | 3 | 14422903 | 0.331223629 | 0.246915796 | 0.028120409 | 2 |
|  | S3_13598294 | 3 | 13598294 | 0.335443038 | 0.209370411 | 0.028120409 | 2 |
|  | S3_265316   | 3 | 265316   | 0.327004219 | 0.259047012 | 0.028120409 | 2 |
|  | S3_1066750  | 3 | 1066750  | 0.208860759 | 0.194178869 | 0.028120409 | 2 |
|  | S3_10836535 | 3 | 10836535 | 0.229957806 | 0.181508634 | 0.028120409 | 2 |
|  | S3_18838966 | 3 | 18838966 | 0.210970464 | 0.230113626 | 0.028120409 | 2 |
|  | S3_4305461  | 3 | 4305461  | 0.337552743 | 0.248774684 | 0.028120409 | 2 |
|  | S3_951268   | 3 | 951268   | 0.339662447 | 0.211500453 | 0.028120409 | 2 |
|  | S3_1066739  | 3 | 1066739  | 0.215189873 | 0.191766132 | 0.028120409 | 2 |
|  | S3_1940787  | 3 | 1940787  | 0.333333333 | 0.226662665 | 0.029318709 | 2 |
|  | S3_13316810 | 3 | 13316810 | 0.329113924 | 0.252031476 | 0.02997139  | 2 |
|  | S3_23257153 | 3 | 23257153 | 0.35021097  | 0.241055397 | 0.02997139  | 2 |
|  | S3_21762832 | 3 | 21762832 | 0.23628692  | 0.200011323 | 0.032612039 | 2 |

|  |              |    |          |             |              |             |   |
|--|--------------|----|----------|-------------|--------------|-------------|---|
|  | S3_1940825   | 3  | 1940825  | 0.219409283 | 0.217544856  | 0.033119807 | 2 |
|  | S3_14638969  | 3  | 14638969 | 0.20464135  | 0.20816951   | 0.03550368  | 2 |
|  | S3_4926121   | 3  | 4926121  | 0.286919831 | 0.175108216  | 0.035508421 | 2 |
|  | S3_4926123   | 3  | 4926123  | 0.286919831 | 0.175108216  | 0.035508421 | 2 |
|  | S3_4791541   | 3  | 4791541  | 0.20464135  | 0.20719061   | 0.036900973 | 2 |
|  | S3_14277010  | 3  | 14277010 | 0.339662447 | 0.219666949  | 0.037620314 | 2 |
|  | S3_14277018  | 3  | 14277018 | 0.339662447 | 0.219666949  | 0.037620314 | 2 |
|  | S3_8105992   | 3  | 8105992  | 0.327004219 | 0.246577952  | 0.038230098 | 2 |
|  | S3_8106968   | 3  | 8106968  | 0.329113924 | 0.247937453  | 0.039380573 | 2 |
|  | S3_5755118   | 3  | 5755118  | 0.352320675 | 0.166812736  | 0.039380573 | 2 |
|  | S3_10174220  | 3  | 10174220 | 0.206751055 | 0.221453342  | 0.039380573 | 2 |
|  | S3_8107007   | 3  | 8107007  | 0.324894515 | 0.247283484  | 0.039857452 | 2 |
|  | S3_951388    | 3  | 951388   | 0.331223629 | 0.215962817  | 0.039857452 | 2 |
|  | S3_7859939   | 3  | 7859939  | 0.343881857 | 0.217065913  | 0.040598557 | 2 |
|  | S3_2019299   | 3  | 2019299  | 0.194092827 | 0.221310012  | 0.040598557 | 2 |
|  | S3_2032939   | 3  | 2032939  | 0.202531646 | 0.198904235  | 0.040598557 | 2 |
|  | S3_2032882   | 3  | 2032882  | 0.208860759 | 0.194462216  | 0.044558432 | 2 |
|  | S10_21319026 | 10 | 21319026 | 0.272151899 | 0.264328317  | 0.009783359 | 2 |
|  | S10_21319060 | 10 | 21319060 | 0.272151899 | 0.264328317  | 0.009783359 | 2 |
|  | S10_28026244 | 10 | 28026244 | 0.335443038 | 0.196424588  | 0.0244633   | 2 |
|  | S10_9101907  | 10 | 9101907  | 0.32278481  | 0.220603874  | 0.028120409 | 2 |
|  | S10_9101926  | 10 | 9101926  | 0.32278481  | 0.220603874  | 0.028120409 | 2 |
|  | S11_16654495 | 11 | 16654495 | 0.331223629 | 0.17569753   | 0.035705409 | 2 |
|  | S12_17501478 | 12 | 17501478 | 0.308016878 | 0.220028962  | 0.0244633   | 2 |
|  | S16_8791589  | 16 | 8791589  | 0.265822785 | 0.18416558   | 0.028788959 | 2 |
|  | S18_19991790 | 18 | 19991790 | 0.29535865  | 0.263111942  | 0.007722992 | 2 |
|  | S18_19991805 | 18 | 19991805 | 0.29535865  | 0.263111942  | 0.007722992 | 2 |
|  | S18_29587371 | 18 | 29587371 | 0.289029536 | -0.190780811 | 0.008831843 | 2 |
|  | S18_32070713 | 18 | 32070713 | 0.253164557 | 0.18260382   | 0.032612039 | 2 |
|  | S18_32070700 | 18 | 32070700 | 0.246835443 | 0.176713304  | 0.040598557 | 2 |

1

2

- 1 Supplemental Table 6: SNPs located in genic regions and associated with Mg, Na,
- 2 marginal chlorosis (MC), stunting (SL), and symptoms (Symp) in 2015 and 2016 using the
- 3 Thompson Seedless annotation.

| SNP          | GENE  | TRAIT | YEAR       |
|--------------|-------|-------|------------|
| S10_19692199 | g1087 | Symp  | 2015, 2016 |
| S3_149721    | g1405 | MC    | 2015, 2016 |
|              |       | SL    | 2015, 2016 |
|              |       | Symp  | 2015, 2016 |
| S3_265316    | g1407 | MC    | 2015, 2016 |
|              |       | SL    | 2015, 2016 |
|              |       | Symp  | 2015, 2016 |
| S3_921272    | g1462 | MC    | 2015       |
|              |       | SL    | 2015, 2016 |
|              |       | Symp  | 2015, 2016 |
| S3_2019299   | g1518 | SL    | 2016       |
|              |       | Symp  | 2016       |
| S3_2032939   | g1523 | SL    | 2015, 2016 |
|              |       | Symp  | 2015, 2016 |
| S3_2032882   | g1523 | Symp  | 2015, 2016 |
|              |       | SL    | 2015, 2016 |
| S3_2032883   | g1523 | SL    | 2015       |
| S3_2800042   | g1599 | MC    | 2015, 2016 |
|              |       | SL    | 2015, 2016 |
|              |       | Symp  | 2015, 2016 |
| S3_3184421   | g1621 | SL    | 2015       |
| S3_3366649   | g1632 | MC    | 2015, 2016 |
|              |       | SL    | 2016       |
|              |       | Mg    | 2015       |
| S3_3366650   | g1632 | MC    | 2015       |
|              |       | Mg    | 2015       |
|              |       | SL    | 2015, 2016 |
|              |       | Symp  | 2015, 2016 |
| S3_3755967   | g1649 | MC    | 2016       |
|              |       | Symp  | 2016       |
| S3_3762073   | g1649 | MC    | 2015       |
| S3_4305461   | g1676 | MC    | 2015       |
|              |       | SL    | 2016       |
|              |       | Symp  | 2016       |
| S3_4773182   | g1689 | Symp  | 2016       |
| S3_4784875   | g1690 | SL    | 2015       |

|             |       |      |            |
|-------------|-------|------|------------|
|             |       | Symp | 2015       |
| S3_4791541  | g1691 | SL   | 2016       |
|             |       | Symp | 2016       |
| S3_4805266  | g1692 | MC   | 2016       |
| S3_5336687  | g1724 | MC   | 2015, 2016 |
|             |       | SL   | 2016       |
|             |       | Symp | 2016       |
| S3_5569343  | g1736 | MC   | 2015, 2016 |
|             |       | SL   | 2015, 2016 |
|             |       | Symp | 2015, 2016 |
| S3_5755118  | g1741 | SL   | 2015, 2016 |
|             |       | Symp | 2016       |
| S3_7859939  | g1859 | MC   | 2015       |
|             |       | SL   | 2016       |
|             |       | Symp | 2016       |
| S3_8104173  | g1868 | Symp | 2016       |
| S3_8105992  | g1868 | MC   | 2015       |
|             |       | SL   | 2016       |
|             |       | Symp | 2016       |
| S3_8106968  | g1868 | MC   | 2015       |
|             |       | SL   | 2016       |
|             |       | Symp | 2016       |
| S3_8107007  | g1868 | MC   | 2015       |
|             |       | SL   | 2016       |
|             |       | Symp | 2016       |
| S3_8105992  | g1868 | MC   | 2015       |
| S3_8415247  | g1882 | MC   | 2015, 2016 |
|             |       | SL   | 2016       |
|             |       | Symp | 2016       |
| S3_10174220 | g1999 | SL   | 2015, 2016 |
|             |       | Symp | 2015, 2016 |
| S3_10836535 | g2020 | MC   | 2016       |
|             |       | SL   | 2016       |
|             |       | Symp | 2016       |
| S3_11143564 | g2026 | MC   | 2016       |
| S3_11599143 | g2046 | MC   | 2015, 2016 |
|             |       | SL   | 2015, 2016 |
|             |       | Symp | 2015, 2016 |
| S3_12359712 | g2086 | MC   | 2015, 2016 |
|             |       | SL   | 2015, 2016 |

|             |        |      |            |
|-------------|--------|------|------------|
|             |        | Symp | 2015, 2016 |
|             |        | MC   | 2015, 2016 |
| S3_13577682 | g2137  | MC   | 2015, 2016 |
|             |        | SL   | 2015, 2016 |
|             |        | Symp | 2015, 2016 |
| S3_13577823 | g2137  | MC   | 2015       |
| S3_14277010 | g2174  | MC   | 2015       |
|             |        | SL   | 2016       |
|             |        | Symp | 2016       |
| S3_14277018 | g2174  | MC   | 2015       |
|             |        | SL   | 2016       |
|             |        | Symp | 2016       |
| S3_14537967 | g2185  | MC   | 2015, 2016 |
|             |        | SL   | 2015, 2016 |
|             |        | Symp | 2015, 2016 |
| S3_15151065 | g2217  | MC   | 2015, 2016 |
|             |        | SL   | 2015, 2016 |
|             |        | Symp | 2015, 2016 |
| S3_18838966 | g2363  | MC   | 2015       |
|             |        | SL   | 2015, 2016 |
|             |        | Symp | 2015, 2016 |
| S3_22457867 | g2581  | MC   | 2015       |
|             |        | SL   | 2015, 2016 |
|             |        | Symp | 2015, 2016 |
| S3_23241926 | g2622  | MC   | 2015, 2016 |
|             |        | SL   | 2015, 2016 |
|             |        | Symp | 2015, 2016 |
| S3_23242021 | g2622  | MC   | 2015       |
|             |        | SL   | 2015       |
|             |        | Symp | 2015       |
| S3_23242056 | g2622  | MC   | 2015       |
|             |        | Symp | 2015       |
|             |        | SL   | 2015       |
| S1_17012584 | g26984 | MC   | 2015       |
|             |        | SL   | 2015, 2016 |
| S10_9101907 | g575   | MC   | 2015, 2016 |
|             |        | Symp | 2016       |
|             |        | SL   | 2016       |
| S10_9101926 | g575   | MC   | 2015, 2016 |
|             |        | SL   | 2016       |

|              |        |      |      |
|--------------|--------|------|------|
|              |        | Symp | 2016 |
| S11_11635675 | g13071 | Na   | 2016 |

1

2

- 1 Supplemental Table 7: SNPs located in genic regions and associated with Mg, Na,
- 2 marginal chlorosis (MC), stunting (SL), and symptoms (Symp) in 2015 and 2016 using the
- 3 PN40024 v3 annotation.
- 4

| SNP        | Gene          | Trait | Year       |
|------------|---------------|-------|------------|
| S3 2846002 | Vitvi03g00243 | SL    | 2015, 2016 |
|            |               | Symp  | 2016       |
| S3 2876678 | Vitvi03g00247 | SL    | 2015, 2016 |
| S3 4196400 | Vitvi03g00380 | MC    | 2016       |
|            |               | SL    | 2015, 2016 |
| S3 4208958 | Vitvi03g00384 | MC    | 2016       |
|            |               | SL    | 2015, 2016 |
|            |               | Symp  | 2015, 2016 |
| S3 4209015 | Vitvi03g00384 | MC    | 2016       |
|            |               | SL    | 2015, 2016 |
|            |               | Symp  | 2015, 2016 |
| S3 4637832 | Vitvi03g00430 | MC    | 2015, 2016 |
|            |               | SL    | 2015, 2016 |
|            |               | Symp  | 2015, 2016 |
| S3 5653914 | Vitvi03g00520 | MC    | 2015, 2016 |
|            |               | SL    | 2015, 2016 |
|            |               | Symp  | 2015, 2016 |
| S3 5852953 | Vitvi03g00534 | MC    | 2016       |
|            |               | SL    | 2015, 2016 |
|            |               | Symp  | 2015, 2016 |
| S3 5885203 | Vitvi03g00537 | MC    | 2016       |
| S3 5961430 | Vitvi03g00540 | MC    | 2016       |
| S3 5986778 | Vitvi03g00543 | MC    | 2015, 2016 |
|            |               | SL    | 2015, 2016 |
|            |               | Symp  | 2015, 2016 |
| S3 6167883 | Vitvi03g00560 | MC    | 2015, 2016 |
|            |               | SL    | 2015, 2016 |
|            |               | Symp  | 2015, 2016 |
| S3 6554413 | Vitvi03g00583 | MC    | 2015, 2016 |
|            |               | SL    | 2015, 2016 |
|            |               | Symp  | 2015, 2016 |
| S3 6823070 | Vitvi03g00603 | MC    | 2015, 2016 |
|            |               | Mg    | 2015       |
|            |               | SL    | 2015, 2016 |
|            |               | Symp  | 2015, 2016 |
| S3 6823120 | Vitvi03g00603 | MC    | 2016       |
| S3 7009508 | Vitvi03g00617 | MC    | 2016       |
| S3 7815436 | Vitvi03g00688 | Symp  | 2015,2016  |
| S3 7815488 | Vitvi03g00688 | Symp  | 2015,2016  |
| S3 7097770 | Vitvi03g00626 | MC    | 2016       |
| S3 8516174 | Vitvi03g00724 | MC    | 2016       |
|            |               | SL    | 2015, 2016 |
|            |               | Symp  | 2016       |
| S3 9107785 | Vitvi03g00756 | MC    | 2015, 2016 |
|            |               | SL    | 2015, 2016 |
| S3 9286732 | Vitvi03g00772 | MC    | 2015, 2016 |
|            |               | Mg    | 2015       |
|            |               | SL    | 2015, 2016 |
| S3 9374358 | Vitvi03g00777 | MC    | 2015, 2016 |
|            |               | SL    | 2015, 2016 |
|            |               | Symp  | 2015, 2016 |

|             |               |      |            |
|-------------|---------------|------|------------|
| S3 9441309  | Vitvi03g00783 | MC   | 2015, 2016 |
|             |               | SL   | 2015, 2016 |
| S3 11054913 | Vitvi03g00846 | MC   | 2016       |
| S3 11308538 | Vitvi03g00855 | MC   | 2015, 2016 |
|             |               | SL   | 2015, 2016 |
|             |               | Symp | 2015, 2016 |
| S3 11368101 | Vitvi03g00858 | MC   | 2015, 2016 |
|             |               | SL   | 2015, 2016 |
| S3 12779089 | Vitvi03g00925 | MC   | 2015, 2016 |
|             |               | SL   | 2015, 2016 |
| S3 14475933 | Vitvi03g00997 | MC   | 2016       |
|             |               | SL   | 2015, 2016 |
| S3 14476028 | Vitvi03g00997 | MC   | 2015       |
|             |               | SL   | 2015       |
|             |               | Symp | 2015       |
| S3 14786293 | Vitvi03g01012 | MC   | 2015, 2016 |
|             |               | SL   | 2015, 2016 |
|             |               | Symp | 2015, 2016 |
| S3 16246430 | Vitvi03g01067 | MC   | 2015, 2016 |
|             |               | SL   | 2015, 2016 |
| S3 16701286 | Vitvi03g01088 | MC   | 2016       |
|             |               | MC   | 2016       |
|             |               | SL   | 2016       |
|             |               | Symp | 2016       |
| S3 16707340 | Vitvi03g01088 | MC   | 2016       |
| S3 16774264 | Vitvi03g01092 | MC   | 2016       |
|             |               | SL   | 2016       |
|             |               | Symp | 2016       |
| S3 16774395 | Vitvi03g01092 | MC   | 2015, 2016 |
|             |               | SL   | 2015, 2016 |
|             |               | Symp | 2016       |
| S3 18739154 | Vitvi03g01193 | SL   | 2015       |
|             |               | Symp | 2015       |
| S3 16247276 | Vitvi03g01318 | MC   | 2016       |
|             |               | SL   | 2016       |
|             |               | Symp | 2016       |
| S3 4201002  | Vitvi03g01518 | MC   | 2015, 2016 |
|             |               | SL   | 2015, 2016 |
| S3 6106914  | Vitvi03g01581 | MC   | 2015, 2016 |
|             |               | SL   | 2015, 2016 |
| S3 7076477  | Vitvi03g01606 | MC   | 2015, 2016 |
|             |               | Mg   | 2015       |
|             |               | SL   | 2015, 2016 |
| S3 8895549  | Vitvi03g01649 | MC   | 2015, 2016 |
|             |               | Mg   | 2015       |
|             |               | SL   | 2015, 2016 |
| S3 9889752  | Vitvi03g01681 | MC   | 2016       |
| S3 10848055 | Vitvi03g01704 | SL   | 2015       |
| S3 12277516 | Vitvi03g01727 | MC   | 2016       |
| S3 15171032 | Vitvi03g01769 | MC   | 2015, 2016 |
|             |               | SL   | 2015, 2016 |
| S3 15171570 | Vitvi03g01769 | MC   | 2015, 2016 |
|             |               | SL   | 2015, 2016 |
| S3 16473090 | Vitvi03g01792 | MC   | 2016       |
|             |               | SL   | 2015, 2016 |
|             |               | Symp | 2015, 2016 |
| S3 17225576 | Vitvi03g01812 | MC   | 2016       |
|             |               | SL   | 2016       |
|             |               | Symp | 2016       |

|              |               |      |      |
|--------------|---------------|------|------|
| S3 18840198  | Vitvi03g01841 | SL   | 2015 |
| S6 20771993  | Vitvi06g01435 | MC   | 2016 |
|              |               | SL   | 2016 |
|              |               | Symp | 2016 |
| S11 7516783  | Vitvi11g00662 | SL   | 2016 |
|              |               | Symp | 2016 |
| S11 12185252 | Vitvi11g00916 | Na   | 2016 |
| S11 16113932 | Vitvi11g01100 | Na   | 2016 |
| S11 19320005 | Vitvi11g01270 | Na   | 2016 |
| S11 19319929 | Vitvi11g01270 | Na   | 2016 |
| S11 18313262 | Vitvi11g01649 | Na   | 2016 |
| S11 19307737 | Vitvi11g01681 | Na   | 2016 |
| S11 19311299 | Vitvi11g01682 | Na   | 2016 |
| S17 12265971 | Vitvi17g01006 | Na   | 2016 |

1  
2
